# Supplementary material for: Identification of a small-molecule inhibitor that selectively blocks DNA-binding by Trypanosoma brucei replication protein A1
Source: PubMed Central journal article supplement (PMC10359466; doi:10.1038/s41467-023-39839-x), 2023-07-20
Supplement: 41467_2023_39839_MOESM1_ESM.pdf [file 41467_2023_39839_MOESM1_ESM.pdf]

# Supplementary Information

## Identification of a small-molecule inhibitor that selectively blocks DNA-binding by *Trypanosoma brucei* Replication Protein A1

Aditi Mukherjee<sup>1</sup>, Zakir Hossain<sup>2</sup>, Esteban Erben<sup>3,4</sup>, Shuai Ma<sup>5</sup>, Jun Yong Choi<sup>2,5,6,\*</sup> & Hee-Sook Kim<sup>1,7,\*</sup>

<sup>1</sup>Public Health Research Institute, Rutgers Biomedical Health Sciences, Newark, NJ 07103, USA

<sup>2</sup>Department of Chemistry and Biochemistry, Queens College, New York, NY 11367, USA

<sup>3</sup>Instituto de Investigaciones Biotecnológicas, Universidad Nacional de San Martín (UNSAM) – Consejo Nacional de Investigaciones Científicas y Técnicas (CONICET), San Martín, Provincia de Buenos Aires, Argentina

<sup>4</sup>Escuela de Bio y Nanotecnologías (EByN), Universidad Nacional de San Martín, San Martín, Provincia de Buenos Aires, Argentina

<sup>5</sup>Ph.D. Programs in Chemistry, The Graduate Center of the City University of New York, New York, NY 10016, USA

<sup>6</sup>Ph.D. Programs in Biochemistry, The Graduate Center of the City University of New York, New York, NY 10016, USA

<sup>7</sup>Department of Microbiology, Biochemistry, and Molecular Genetics, New Jersey Medical School, Rutgers Biomedical Health Sciences, Newark, NJ 07103, USA

\* Correspondence: [junyong.choi@gc.cuny.edu](mailto:junyong.choi@gc.cuny.edu); [heesook@njms.rutgers.edu](mailto:heesook@njms.rutgers.edu)

## Supplementary Tables

**Supplementary Table 1. EC<sub>50</sub> values obtained from cell growth experiments comparing the toxicity of JC-229 to *T. brucei*, HEK293, and HeLa cells.** All experiments were performed in triplicate. SD=Standard Deviation.

| 1-A. Growth inhibition of <i>T. brucei</i> and human cell lines by JC-229 (Figure 3f) |                                |     |           |                                               |
|---------------------------------------------------------------------------------------|--------------------------------|-----|-----------|-----------------------------------------------|
| Cell lines                                                                            | Best fit EC <sub>50</sub> (μM) | SD  | R squared | Analysis model                                |
| <i>T. brucei</i>                                                                      | 6.54                           | 0.4 | 0.99      | [Inhibitor] vs. norm response, variable slope |
| HEK293                                                                                | 18.4                           | 2.2 | 0.94      |                                               |
| HeLa                                                                                  | 32.1                           | 2.9 | 0.89      |                                               |

| 1-B. Growth inhibition of <i>T. brucei</i> and human cell lines by JC-229 |                                |     |           |                           |
|---------------------------------------------------------------------------|--------------------------------|-----|-----------|---------------------------|
| Cell lines                                                                | Best fit EC <sub>50</sub> (μM) | SD  | R squared | Analysis model            |
| <i>T. brucei</i>                                                          | 6.58*                          | 0.4 | 0.99      | Sigmoidal, 4-PL, X = conc |
| HEK293                                                                    | 10.3                           | 3.9 | 0.95      |                           |
| HeLa                                                                      | 13.2                           | 2.7 | 0.94      |                           |

\*: Figure 1f

**Supplementary Table 2.  $K_d$  values obtained from MST.** All experiments were performed in triplicate. SD=Standard Deviation.

| <b>2-A. Binding of RPA with ssDNA, dT<sub>32</sub> (Figure 5, 6, &amp; 7; Supplementary Figure 12)</b> |                                       |           |                  |                          |
|--------------------------------------------------------------------------------------------------------|---------------------------------------|-----------|------------------|--------------------------|
| <b>RPA proteins</b>                                                                                    | <b>Best fit <math>K_d</math> (nM)</b> | <b>SD</b> | <b>R squared</b> | <b>Analysis model</b>    |
| <i>Tb</i> RPA1 DBD-AB                                                                                  | 24.6                                  | 12.4      | 0.97             | Binding; one site, total |
| <i>Hs</i> RPA1 DBD-AB                                                                                  | 48.0                                  | 37.4      | 0.96             | Binding; one site, total |
| <i>Tb</i> RPA                                                                                          | 13.2                                  | 3.1       | 0.90             | Binding; one site, total |
| <i>Hs</i> RPA                                                                                          | 15.8                                  | 6.6       | 0.97             | Binding; one site, total |
| <i>Tc</i> RPA1 DBD-AB                                                                                  | 12.6                                  | 3.7       | 0.97             | Binding; one site, total |
| <i>Lmex</i> RPA1 DBD-AB                                                                                | 13.2                                  | 1.6       | 0.98             | Binding; one site, total |
| <i>Tb</i> RPA1 DBD-AB, S105T                                                                           | 21.9                                  | 2.7       | 0.97             | Binding; one site, total |
| <i>Tc</i> RPA1 DBD-AB, T105S                                                                           | 52.4                                  | 27.9      | 0.98             | Binding; one site, total |
| <i>Tb</i> RPA1 DBD-AB, F64A                                                                            | No binding                            | nd        | nd               | Binding; one site, total |
| <i>Tb</i> RPA1 DBD-AB, W188A                                                                           | No binding                            | nd        | nd               | Binding; one site, total |

| <b>2-B. RPA binding with ssDNA in different length (Supplementary Figure 11)</b> |                                       |           |                  |                          |
|----------------------------------------------------------------------------------|---------------------------------------|-----------|------------------|--------------------------|
| <b>RPA proteins (ssDNA probe)</b>                                                | <b>Best fit <math>K_d</math> (nM)</b> | <b>SD</b> | <b>R squared</b> | <b>Analysis model</b>    |
| <i>Tb</i> RPA1 DBD-AB (dT <sub>32</sub> )                                        | 24.6                                  | 12.4      | 0.97             | Binding; one site, total |
| <i>Tb</i> RPA1 DBD-AB (dT <sub>20</sub> )                                        | 30.5                                  | 1.1       | 0.90             | Binding; one site, total |
| <i>Tb</i> RPA1 DBD-AB (dT <sub>12</sub> )                                        | 60.4                                  | 44.3      | 0.76             | Binding; one site, total |
| <i>Tb</i> RPA complex (dT <sub>32</sub> )                                        | 15.5                                  | 4.3       | 0.99             | Binding; one site, total |
| <i>Tb</i> RPA complex (dT <sub>20</sub> )                                        | 17.0                                  | 2.1       | 0.89             | Binding; one site, total |
| <i>Tb</i> RPA complex (dT <sub>12</sub> )                                        | 256                                   | 347       | 0.84             | Binding; one site, total |

| <b>2-C. ssDNA-binding activity of <i>Tb</i>RPA complex containing S105T mutation (Supplementary Figure 18)</b> |                                       |           |                  |                          |
|----------------------------------------------------------------------------------------------------------------|---------------------------------------|-----------|------------------|--------------------------|
| <b>RPA proteins (ssDNA probe)</b>                                                                              | <b>Best fit <math>K_d</math> (nM)</b> | <b>SD</b> | <b>R squared</b> | <b>Analysis model</b>    |
| <i>Tb</i> RPA complex (dT <sub>32</sub> )                                                                      | 15.5                                  | 4.3       | 0.99             | Binding; one site, total |
| <i>Tb</i> RPA-S105T complex (dT <sub>32</sub> )                                                                | 18.8                                  | 2.0       | 0.95             | Binding; one site, total |

| <b>2-D. Binding of <i>Tb</i>RPA1 DBD-A or DBD-B with ssDNA (Supplementary Figure 13)</b> |                                       |           |                  |                          |
|------------------------------------------------------------------------------------------|---------------------------------------|-----------|------------------|--------------------------|
| <b>RPA1 proteins (ssDNA probe)</b>                                                       | <b>Best fit <math>K_d</math> (nM)</b> | <b>SD</b> | <b>R squared</b> | <b>Analysis model</b>    |
| <i>Tb</i> RPA1 DBD-A (dT <sub>32</sub> )                                                 | 5,067                                 | nd        | 0.53             | Binding; one site, total |
| <i>Tb</i> RPA1 DBD-A (dT <sub>20</sub> )                                                 | No binding                            | nd        | nd               | Binding; one site, total |
| <i>Tb</i> RPA1 DBD-B (dT <sub>32</sub> )                                                 | unstable                              | nd        | nd               | Binding; one site, total |
| <i>Tb</i> RPA1 DBD-B (dT <sub>20</sub> )                                                 | No binding                            | nd        | nd               | Binding; one site, total |

**Supplementary Table 3. IC<sub>50</sub> values obtained from MST.** All experiments were performed in triplicate. SD=Standard Deviation.

| <b>3-A. Inhibition of RPA-ssDNA binding by JC-229 (dT<sub>32</sub>) (Figure 5, 6, &amp; 7)</b> |                                      |           |                  |                           |
|------------------------------------------------------------------------------------------------|--------------------------------------|-----------|------------------|---------------------------|
| <b>DBD-AB</b>                                                                                  | <b>Best fit IC<sub>50</sub> (nM)</b> | <b>SD</b> | <b>R squared</b> | <b>Analysis model</b>     |
| <i>Tb</i> RPA1 DBD-AB                                                                          | 228                                  | 11.0      | 0.95             | Sigmoidal, 4-PL, X = conc |
| <i>Hs</i> RPA1 DBD-AB                                                                          | No inhibition                        | nd        | nd               | Sigmoidal, 4-PL, X = conc |
| <i>Tb</i> RPA complex                                                                          | 24.5                                 | 2.0       | 0.96             | Sigmoidal, 4-PL, X = conc |
| <i>Hs</i> RPA complex                                                                          | No inhibition                        | nd        | nd               | Sigmoidal, 4-PL, X = conc |
| <i>Tc</i> RPA1 DBD-AB                                                                          | No inhibition                        | nd        | nd               | Sigmoidal, 4-PL, X = conc |
| <i>Lmex</i> RPA1 DBD-AB                                                                        | No inhibition                        | nd        | nd               | Sigmoidal, 4-PL, X = conc |
| <i>Tb</i> RPA1 DBD-AB, S105T                                                                   | No inhibition                        | nd        | nd               | Sigmoidal, 4-PL, X = conc |
| <i>Tc</i> RPA1 DBD-AB, T105S                                                                   | 159 x 10 <sup>3</sup>                | nd        | 0.87             | Sigmoidal, 4-PL, X = conc |

| <b>3-B. Inhibition of <i>Tb</i>RPA binding with ssDNA in different length (Supplementary Figure 11)</b> |                                      |           |                  |                           |
|---------------------------------------------------------------------------------------------------------|--------------------------------------|-----------|------------------|---------------------------|
| <b>RPA proteins (ssDNA probe)</b>                                                                       | <b>Best fit IC<sub>50</sub> (nM)</b> | <b>SD</b> | <b>R squared</b> | <b>Analysis model</b>     |
| <i>Tb</i> RPA1 DBD-AB (dT <sub>32</sub> )                                                               | 228                                  | 11.0      | 0.95             | Sigmoidal, 4-PL, X = conc |
| <i>Tb</i> RPA1 DBD-AB (dT <sub>20</sub> )                                                               | 881                                  | 234       | 0.91             | Sigmoidal, 4-PL, X = conc |
| <i>Tb</i> RPA1 DBD-AB (dT <sub>12</sub> )                                                               | 2,799                                | 459       | 0.72             | Sigmoidal, 4-PL, X = conc |
| <i>Tb</i> RPA complex (dT <sub>32</sub> )                                                               | 33.9                                 | 13        | 0.91             | Sigmoidal, 4-PL, X = conc |
| <i>Tb</i> RPA complex (dT <sub>20</sub> )                                                               | 33.9                                 | 20        | 0.72             | Sigmoidal, 4-PL, X = conc |
| <i>Tb</i> RPA complex (dT <sub>12</sub> )                                                               | nd                                   | nd        | nd               | nd                        |

| <b>3-C. Inhibition of ssDNA-binding activity of S105T <i>Tb</i>RPA complex by JC-229 (Supplementary Figure 18)</b> |                                      |           |                  |                                                            |
|--------------------------------------------------------------------------------------------------------------------|--------------------------------------|-----------|------------------|------------------------------------------------------------|
| <b>RPA proteins (ssDNA probe)</b>                                                                                  | <b>Best fit IC<sub>50</sub> (nM)</b> | <b>SD</b> | <b>R squared</b> | <b>Analysis model</b>                                      |
| <i>Tb</i> RPA complex (dT <sub>32</sub> )                                                                          | 33.9                                 | 13        | 0.91             | Sigmoidal, 4-PL, X = conc                                  |
| <i>Tb</i> RPA-S105T complex (dT <sub>32</sub> )                                                                    | 48,800                               | nd        | 0.25             | [Inhibitor] vs. response, variable slope (four parameters) |

**Supplementary Table 4.  $K_d$  and  $IC_{50}$  values for HsDBD-F and Cy5-ATRIP interaction and inhibition by JC-229 (by MST).** All experiments were performed in triplicate. SD=Standard Deviation.

| <b>4-A. Binding of HsDBD-F with ATRIP peptide (Supplementary Figure 14)</b> |                       |                      |           |                          |
|-----------------------------------------------------------------------------|-----------------------|----------------------|-----------|--------------------------|
| Proteins                                                                    | Best fit $K_d$ (nM)   | SD                   | R squared | Analysis model           |
| HsDBD-F                                                                     | 34.3 x10 <sup>3</sup> | 3.8 x10 <sup>3</sup> | 0.95      | Binding; one site, total |
| BSA                                                                         | nd                    | nd                   | 0.25      | Binding; one site, total |

| <b>4-B. Inhibition of HsDBD-F and ATRIP interaction by JC-229 (Supplementary Figure 14)</b> |                         |                       |           |                           |
|---------------------------------------------------------------------------------------------|-------------------------|-----------------------|-----------|---------------------------|
| RPA proteins                                                                                | Best fit $IC_{50}$ (nM) | SD                    | R squared | Analysis model            |
| HsDBD-F                                                                                     | 60.8 x10 <sup>3</sup>   | 44.6 x10 <sup>3</sup> | 0.94      | Sigmoidal, 4-PL, X = conc |

**Supplementary Table 5.  $EC_{50}$  values obtained from cell growth experiments comparing the toxicity of JC-229 to WT, *TbRPA1* sKO, and *TbRPA1* S105T mutant strains.** All experiments were performed in triplicate. SD=Standard Deviation.

| <b>5-A. Growth inhibition of WT and S105T mutant <i>T. brucei</i> cells by JC-229 (Figure 8)</b> |                               |      |           |                                               |
|--------------------------------------------------------------------------------------------------|-------------------------------|------|-----------|-----------------------------------------------|
| <i>T. brucei</i> cell lines                                                                      | Best fit $EC_{50}$ ( $\mu$ M) | SD   | R squared | Analysis model                                |
| WT (WT / WT)                                                                                     | 5.68                          | 0.16 | 0.98      | [Inhibitor] vs. norm response, variable slope |
| Single KO ( $\Delta$ / WT)                                                                       | 4.93                          | 0.15 | 0.98      |                                               |
| S105T clone 1 ( $\Delta$ / RPA1-S105T)                                                           | 30.4                          | 1.37 | 0.94      |                                               |
| S105T clone 2 ( $\Delta$ / RPA1-S105T)                                                           | 21.7                          | 2.36 | 0.94      |                                               |
| S105T clone 3 ( $\Delta$ / RPA1-S105T)                                                           | 19.6                          | 5.77 | 0.89      |                                               |

| <b>5-B. Growth inhibition of WT and S105T mutant <i>T. brucei</i> cells by JC-229</b> |                               |      |           |                           |
|---------------------------------------------------------------------------------------|-------------------------------|------|-----------|---------------------------|
| <i>T. brucei</i> cell lines                                                           | Best fit $EC_{50}$ ( $\mu$ M) | SD   | R squared | Analysis model            |
| WT (WT / WT)                                                                          | 5.65                          | 0.22 | 0.98      | Sigmoidal, 4-PL, X = conc |
| Single KO ( $\Delta$ / WT)                                                            | 4.61                          | 0.17 | 0.99      |                           |
| S105T clone 1 ( $\Delta$ / RPA1-S105T)                                                | 17.4                          | 24.3 | 0.94      |                           |
| S105T clone 2 ( $\Delta$ / RPA1-S105T)                                                | 30                            | 31.9 | 0.94      |                           |
| S105T clone 3 ( $\Delta$ / RPA1-S105T)                                                | 16.5                          | 5.3  | 0.89      |                           |

**Supplementary Table 6. *T. brucei* cell lines used in this study.**

| Name     | Genotype                                                                                                                                      | Reference  |
|----------|-----------------------------------------------------------------------------------------------------------------------------------------------|------------|
| 2T1      | PUR at rDNA locus (landing pad), T7 RNA Polymerase & Tet Repressor with PHLEO marker                                                          | 1          |
| AMT2     | PHLEO marker in 2T1 strain was replaced with NEO by transfecting pT7-NEO vector                                                               | This study |
| AMT5     | <i>TbRPA1</i> RNAi vector (pOH10) integrated at rDNA locus in AMT2 WT strain; KD clone 1                                                      | This study |
| AMT6     | <i>TbRPA1</i> RNAi vector (pOH10) integrated at rDNA locus in AMT2 WT strain; KD clone 2                                                      | This study |
| HSTB-904 | WT in Single marker (SM) background, the active BES1 promoter marked with BSD, Cre-recombinase under Tet control at rDNA spacer               | 2,3        |
| AMT30    | Single KO (WT/ <i>TbRPA1</i> Δ): pSUN18 (a <i>TbRPA1</i> KO vector with HYG-TK) transfected in HSTB-904 to delete one allele of <i>TbRPA1</i> | This study |
| AMT38    | <i>TbRPA1</i> -S105T mutant clone 1 (S105T/Δ): AMT30 strain transfected with pAD10 ( <i>TbRPA1</i> -S105T knock-in vector with PUR marker)    | This study |
| AMT39    | <i>TbRPA1</i> -S105T mutant clone 2 (S105T/Δ): AMT30 strain transfected with pAD10 ( <i>TbRPA1</i> -S105T knock-in vector with PUR marker)    | This study |
| AMT41    | <i>TbRPA1</i> -S105T mutant clone 3 (S105T/Δ): AMT30 strain transfected with pAD10 ( <i>TbRPA1</i> -S105T knock-in vector with PUR marker)    | This study |

**Supplementary Table 7. Plasmids used in this study.**

| Name           | Description                                                                                                             | Reference  |
|----------------|-------------------------------------------------------------------------------------------------------------------------|------------|
| p2T7-NEO       | T7 RNA polymerase, NEO marker                                                                                           | This study |
| pOH10          | <i>TbRPA1</i> RNAi in p2T7-TA vector                                                                                    | This study |
| pSR2           | T7-lacO-rbs- <i>TbRPA2</i> in pGEM vector                                                                               | This study |
| pSR3           | T7-lacO-rbs- <i>TbRPA3</i> in pGEM vector                                                                               | This study |
| pSR5           | 6xHis- <i>TbRPA1</i> DBD-AB in pET28a vector                                                                            | This study |
| pSR6           | <i>TbRPA3</i> in pET28a vector                                                                                          | This study |
| pSR7           | <i>TbRPA2</i> and <i>TbRPA3</i> in pET28a vector                                                                        | This study |
| pSR8           | 6xHis- <i>TbRPA1</i> , <i>TbRPA2</i> , <i>TbRPA3</i> in pET28a (all three subunits have their own T7 promoter-lacO-rbs) | This study |
| pSR9           | 6xHis- <i>TbRPA1</i> DBD-AB-F64A in pET28a vector                                                                       | This study |
| pSR10          | 6xHis- <i>TbRPA1</i> DBD-AB-W188A in pET28a vector                                                                      | This study |
| pAM.Tc1        | 6xHis- <i>TcRPA1</i> DBD-AB in pET28a                                                                                   | This study |
| pSR15          | 6xHis- <i>HsRPA1</i> DBD-AB in pET28a                                                                                   | This study |
| pAM.Lm1        | 6xHis- <i>LmexRPA1</i> DBD-AB in pET28a                                                                                 | This study |
| pSR18i         | 6xHis- <i>HsRPA1</i> , <i>HsRPA2</i> , <i>HsRPA3</i> in pET28a (all three subunits have their own T7 promoter-lacO-rbs) | This study |
| pSR21          | 6xHis- <i>TbRPA1</i> DBD-AB with S105T mutation in pET28a                                                               | This study |
| pSR23          | 6xHis- <i>TcRPA1</i> DBD-AB with T105S mutation in pET28a                                                               | This study |
| p11d-tRPA(123) | <i>HsRPA1</i> , <i>HsRPA2</i> , <i>HsRPA3</i> in pET11d                                                                 | 4          |
| pSR26          | 6xHis- <i>TbRPA</i> complex with <i>TbRPA1</i> -S105T mutation in pET28a vector                                         | This study |
| pSR28          | 6xHis- <i>TbRPA1</i> DBD-A in pET28a vector                                                                             | This study |
| pSR29          | 6xHis- <i>TbRPA1</i> DBD-B in pET28a vector                                                                             | This study |
| pSR31          | 6xHis- <i>HsRPA1</i> DBD-F in pET28a vector                                                                             | This study |
| pSUN18         | <i>TbRPA1</i> deletion vector with floxed HYG-TK marker                                                                 | This study |
| pAD10          | <i>TbRPA1</i> -S105T knock-in vector with PUR marker                                                                    | This study |

**Supplementary Table 8. Oligonucleotides used in this study.**

| Name | Description                                                                                                    | Sequences                                                                                                      |
|------|----------------------------------------------------------------------------------------------------------------|----------------------------------------------------------------------------------------------------------------|
| 778  | Forward to amplify <i>TbRPA1</i> RNAi target region                                                            | ATGCAGCAGCCATCACAACAACAG                                                                                       |
| 779  | Reverse to amplify <i>TbRPA1</i> RNAi target region                                                            | TCACGTCAGGGATGTTTGGATTAA                                                                                       |
| 1089 | Forward to amplify T7-lacO-rbs- <i>TbRPA3</i> (HindIII)                                                        | ttaagcttcgaaattaatacgcactcactataggggaattgtgagcggat<br>aacaattcccctttaagaaggagataccCGTATGCGTTCAGC<br>TGTTAAT    |
| 1090 | Reverse to amplify T7-lacO-rbs- <i>TbRPA3</i> (XhoI)                                                           | tttctcgagCTAAAAGAGTGCTGGAACTT                                                                                  |
| 1091 | Forward to amplify T7-lacO-rbs- <i>TbRPA2</i> (BamHI)                                                          | tttgatccccgaaattaatacgcactcactataggggaattgtgagcggga<br>taacaattcccctttaagaaggagatataaccATGGAAGGAAG<br>TGGAAGTA |
| 1092 | Reverse to amplify T7-lacO-rbs- <i>TbRPA2</i> (HindIII)                                                        | ttaagcttTAAATGCCAACTTACAATC                                                                                    |
| 1066 | Forward to amplify and clone <i>TbRPA1</i> full-length or DBD-AB into pET28a (NheI)                            | tttgctagcCAGCAGCCATCACAACAACAGA                                                                                |
| 1093 | Reverse to amplify full-length <i>TbRPA1</i> with BgIII (PCR with forward oligo 1066)                          | tttagatctTTACAAGTAGGCATTAATGCAT                                                                                |
| 1094 | Reverse to amplify <i>TbRPA1</i> DBD-AB with stop codon, XhoI (PCR with forward oligo 1066)                    | tttctcgagTTATCCCTGCATTGAAAGTGAAGT                                                                              |
| 1221 | Forward to introduce <i>TbRPA1</i> -F64A mutation by Quick change                                              | ATCCGAGCGACGGTAgcCAATGAGGCCGTCGAC                                                                              |
| 1222 | Reverse to introduce <i>TbRPA1</i> -F64A mutation by Quick change                                              | AGAAGCAGACTCGTCAATGAGCGT                                                                                       |
| 1223 | Forward to introduce <i>TbRPA1</i> -W188A mutation by Quick change                                             | ATTGACGTCACCCTGgcGAACGAAAACGCCAAA                                                                              |
| 1224 | Reverse to introduce <i>TbRPA1</i> -W188A mutation by Quick change                                             | CCCCGCGGTGGAATCGGCAAC                                                                                          |
| 1225 | Forward to amplify <i>TcRPA1</i> DBD-AB (NheI)                                                                 | tttgctagcCAACACCCGAGCAATCAGCA                                                                                  |
| 1226 | Reverse to amplify <i>TcRPA1</i> DBD-AB (stop codon, HindIII)                                                  | ttaagcttTAAACCAAGGAAGAGAGCGAAGA                                                                                |
| 1227 | Forward to amplify <i>HsRPA1</i> DBD-AB (NheI)                                                                 | tttgctagcCAGTCCAAAGTGGTGCCATT                                                                                  |
| 1228 | Reverse to amplify <i>HsRPA1</i> DBD-AB (stop codon, BamHI)                                                    | tttgatccTTAGATGGAAACACCATCTAAGGC                                                                               |
| 1232 | Reverse to amplify upstream region of <i>HsRPA1</i> to tag the N-terminus with 6xHis in p11d-tRPA-123 vector   | GCTAGCCATATGGCTGCCGCGCGGCACCAGGC<br>CGCTGCTGTGATGATGATGATGATGGCTGCTGC<br>CCATGGTATATCTCCTTCTTAAAGTTAA          |
| 1233 | Forward to amplify downstream region of <i>HsRPA1</i> to tag the N-terminus with 6xHis in p11d-tRPA-123 vector | ATGGGCAGCAGCCATCATCATCATCACAGC<br>AGCGGCCTGGTGCCGCGCGGCAGCCATATGGC<br>TAGCATGGTCGGCCAGCTGAGCGAG                |



|         |                                                                                                                  |                                                |
|---------|------------------------------------------------------------------------------------------------------------------|------------------------------------------------|
| 1256    | Forward to introduce 6xHis tag to <i>HsRPA1</i> (PCR with reverse oligo 1232)                                    | GATCTCGACGCTCTCCCTTATGCG                       |
| 1257    | Reverse to introduce 6xHis tag to <i>HsRPA1</i> (PCR with forward oligo 1233)                                    | CTTCATAGCTCTTGCAGATCCCGA                       |
| AM75    | Forward to introduce S105T mutation in <i>TbRPA1</i> DBD-AB by Quick change                                      | AATGACTACGAGTTGA <sup>c</sup> CTTTGACAACACCTGT |
| AM76    | Reverse to introduce S105T mutation in <i>TbRPA1</i> DBD-AB by Quick change                                      | ATTCACATTACTGAACTTACGGTTGG                     |
| AM79    | Forward to introduce T105S mutation in <i>TcRPA1</i> DBD-AB by Quick change                                      | AACGACTATGAGCTG <sup>t</sup> CGTTTGATAGCTCGAGT |
| AM80    | Reverse to introduce T105S mutation in <i>TcRPA1</i> DBD-AB by Quick change                                      | GTTACGTTGCTGAACTTGCATT                         |
| Lmex Fw | Forward to amplify <i>LmexRPA1</i> DBD-AB (NheI)                                                                 | tttgctagcCAACAGCCGGGCAGCCACCAG                 |
| Lmex Rv | Reverse to amplify <i>LmexRPA1</i> DBD-AB (Stop codon, BamHI)                                                    | tttgatcccCCCTGCGACGACAAGGACA                   |
| 1290    | Reverse to amplify <i>TbRPA1</i> DBD-A with stop codon, XhoI (PCR with forward oligo 1066)                       | tttctcgagTTAAATCGACGAGCTAACGACATC              |
| 1291    | Forward to amplify <i>TbRPA1</i> DBD-B and clone into pET28a (NheI site and start codon)                         | tttgctagcATGTCGATTCCCCTACAGCGGTAT              |
| 1295    | Forward to amplify <i>HsRPA1</i> DBD-F & clone in pET28a (NheI)                                                  | tttgctagcATGGTCGGCCAGCTGAGCGAG                 |
| 1296    | Reverse to amplify <i>HsRPA1</i> DBD-F & clone in pET28a (stop codon, XhoI)                                      | tttctcgagTACTGTGTTCCCCCAGAAGTGTG               |
| 162     | Forward to genotype <i>TbRPA1</i> KO-HYG-TK allele; anneals on TK gene                                           | CTGCAACTTACCTCCGGGAT                           |
| 776     | Forward to genotype <i>TbRPA1</i> alleles, including WT, KO-HYG-TK, and S105T mutant                             | GGATTTAACCAACAAGAGAGAAAGAACA                   |
| 778     | Forward to amplify <i>TbRPA1</i> WT and S105T alleles for Sanger sequencing (PCR with reverse oligo 1299)        | ATGCAGCAGCCATCACAAACAG                         |
| 1299    | Reverse to genotype <i>TbRPA1</i> alleles, including WT, KO-HYG-TK, and S105T mutant                             | TTCACGCGAAATATCAGTCGTGTC                       |
| AM88    | Forward to amplify TUB-intergenic region and PUR from pMOTag2H vector (with SpeI)                                | actagtTACCCTTACGATGTGCCT                       |
| AM89    | Reverse to amplify TUB-intergenic region and PUR from pMOTag2H vector (with BamHI)                               | ggatccTCAGGCACCGGG                             |
| AM90    | Forward to amplify <i>TbRPA1</i> -S105T CDS from pSR26 & clone into pSUN18 to make KI vector (PstI & ATG)        | ttataaATGCAGCAGCCATCACAA                       |
| AM91    | Reverse to amplify <i>TbRPA1</i> -S105T CDS from pSR26 & clone into pSUN18 to make KI vector (SpeI & stop codon) | actagtTTATTACAAGTAGGCATTAAT                    |

# Supplementary Figures

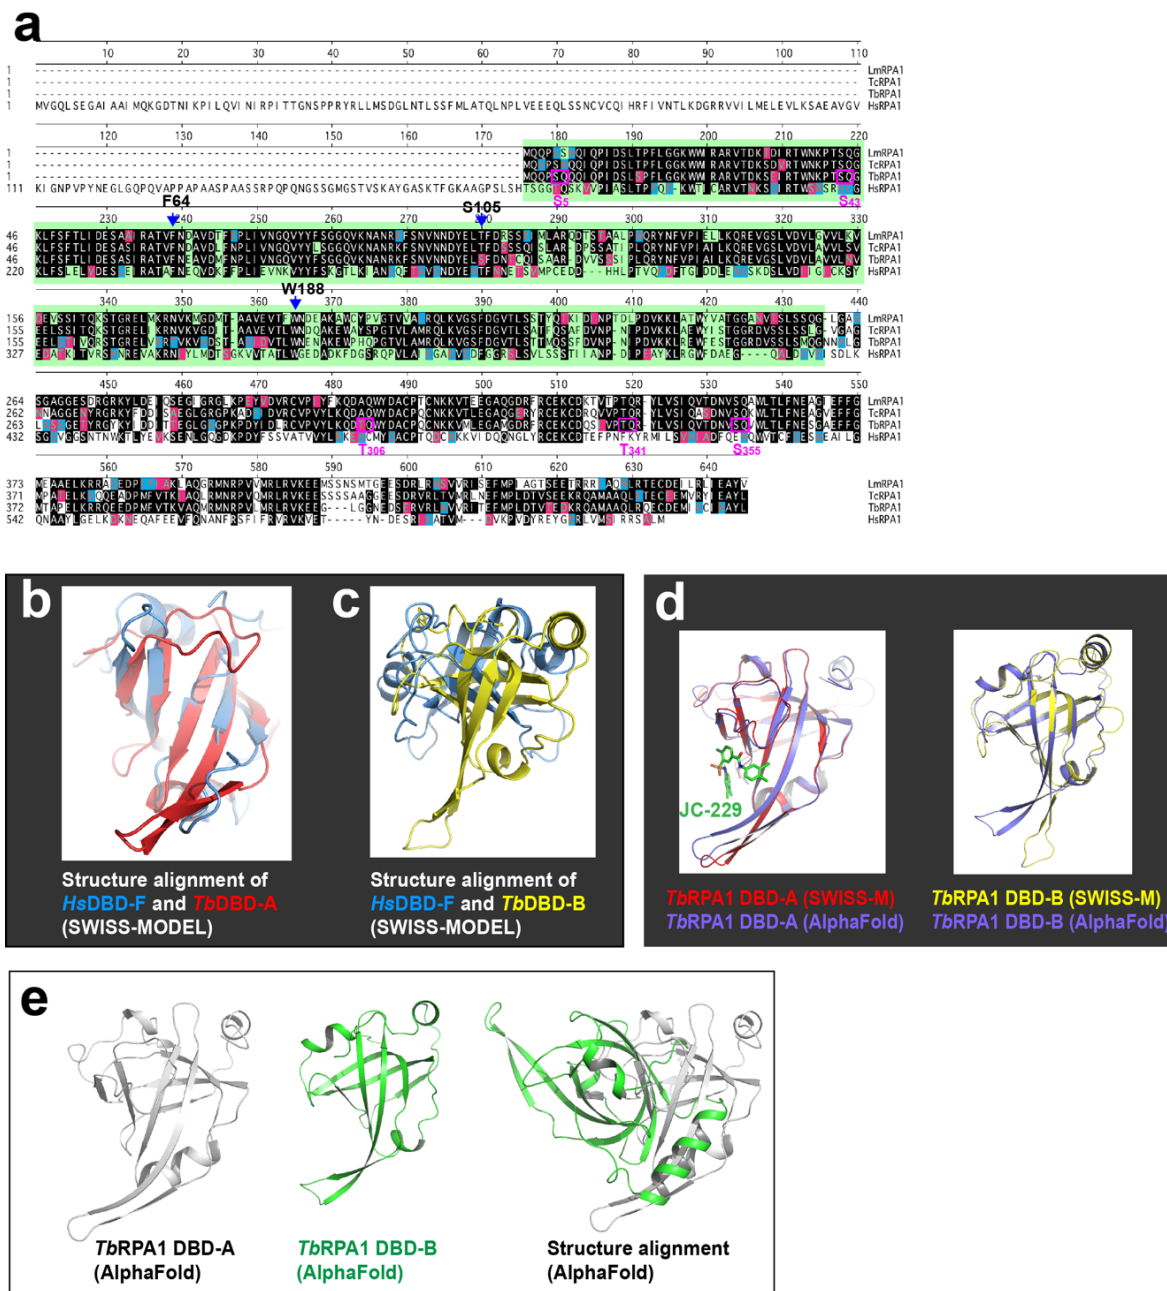

**Supplementary Figure 1. Sequence alignment of *L. major* (same as *L. mexicana*), *T. cruzi*, *T. brucei* and human RPA1 and structure comparison by SWISS vs. AlphaFold models. **a** Sequence alignment of RPA1. DNA-Binding Domain A and B (DBD-AB) are highlighted in green. Three of important amino acid residues indicated with blue arrows were characterized by site-directed mutagenesis, EMSA, and MST assays (F64A and W188A in Supplementary Fig. 12; S105T in Fig. 7 and Supplementary Fig. 17, 18). Serine or Threonine residues in SQ/TQ motifs are labeled and indicated in pink box and pink font. **b, c** Comparison of *HsRPA1* DBD-F with *TbRPA1* DBD-A (**b**; also shown in Fig. 1b) and *TbRPA1* DBD-B (**c**) obtained from SWISS-MODEL. **d** Comparison of *TbRPA1* DBD-A (red) and DBD-B (yellow) 3-D structures obtained from SWISS-MODEL and AlphaFold (purple). Each domain was aligned separately by using Pymol software. JC-229 is shown in green. **e** The 3-D structure models of *TbRPA1* DBD-A (*left*) and *TbRPA1* DBD-B (*middle*) generated from AlphaFold and their structure alignment by Pymol software (*right*).**

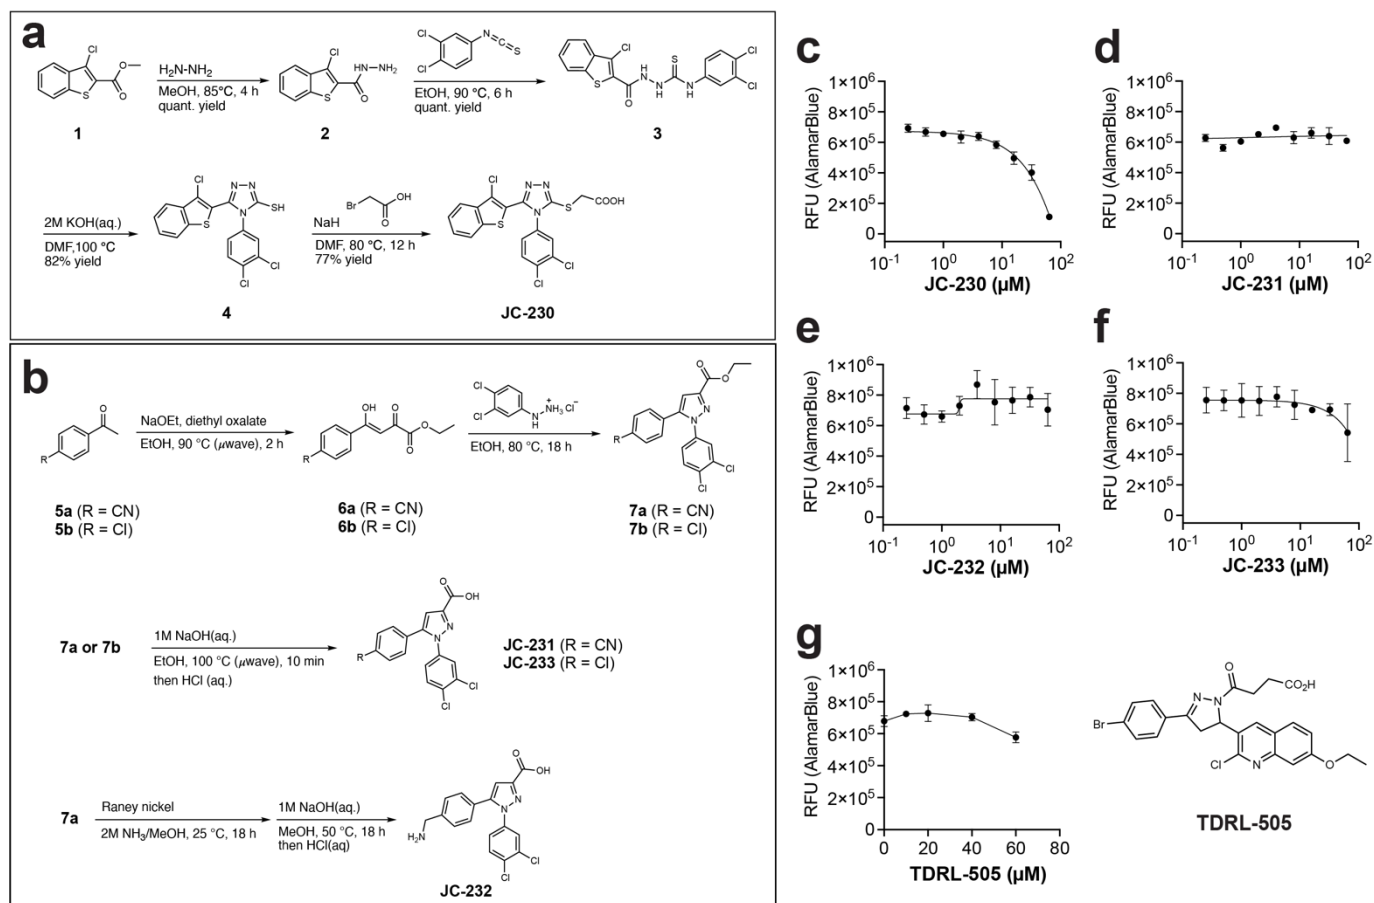

**Supplementary Figure 2. Inhibition of *T. brucei* cell proliferation by JC compounds and TDRL-505 tested at the screening stage. a** Synthesis scheme for JC-230. **b** Synthesis scheme for JC-231, 232, and 233. **c-f** Dose-dependent growth inhibition of *T. brucei* by JC-230, JC-231, JC-232 and JC-233. *T. brucei* cells were treated with increasing concentrations of JC-compounds (0.25 to 64  $\mu\text{M}$ ) for 72 hours and viability was determined with the AlamarBlue assay. **g** Dose-dependent growth inhibition of *T. brucei* by TDRL-505. *T. brucei* cells were treated with increasing concentrations of TDRL-505 (10 to 60  $\mu\text{M}$ ) for 72 hours and viability was determined with the AlamarBlue assay. Three biological replicates were used for each measurement for Supplementary Fig. 2c-g ( $n=3$ ). Error bars indicate mean  $\pm$ SD. A standard 4-Parameter Logistic (4-PL) curve from GraphPad Prism software generated the  $\text{EC}_{50}$  values for JC-230 ( $\text{EC}_{50}$ , 50 $\mu\text{M}$ ). Source data are provided as a Source Data file.

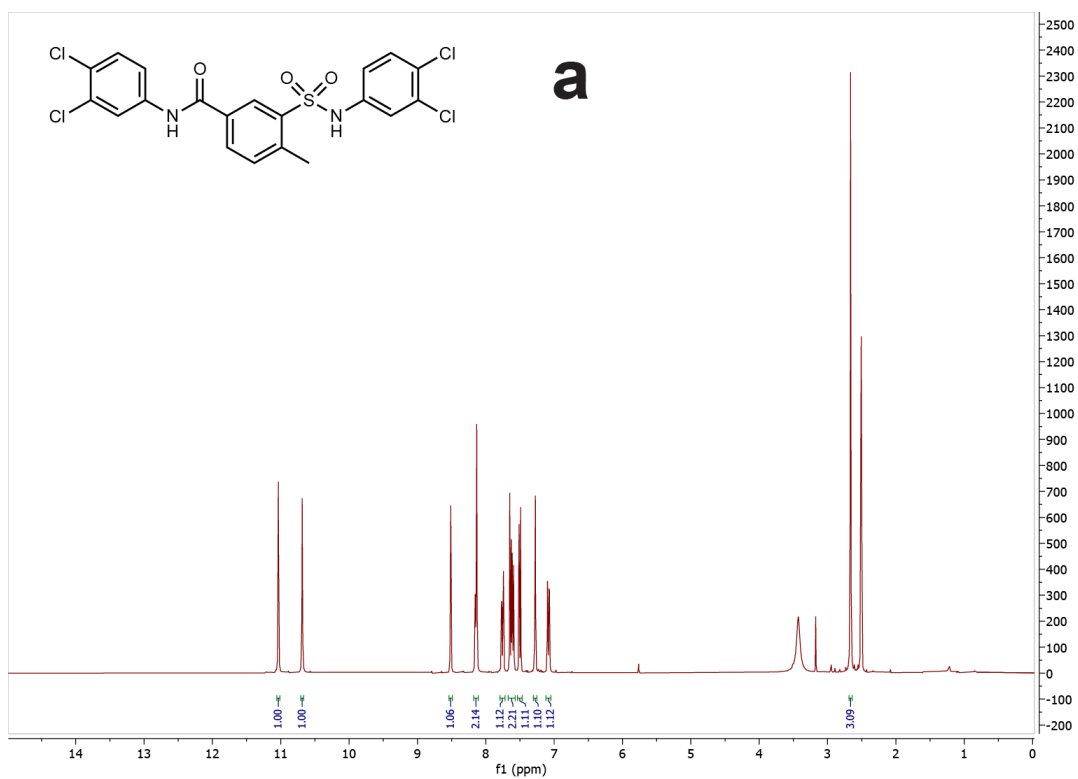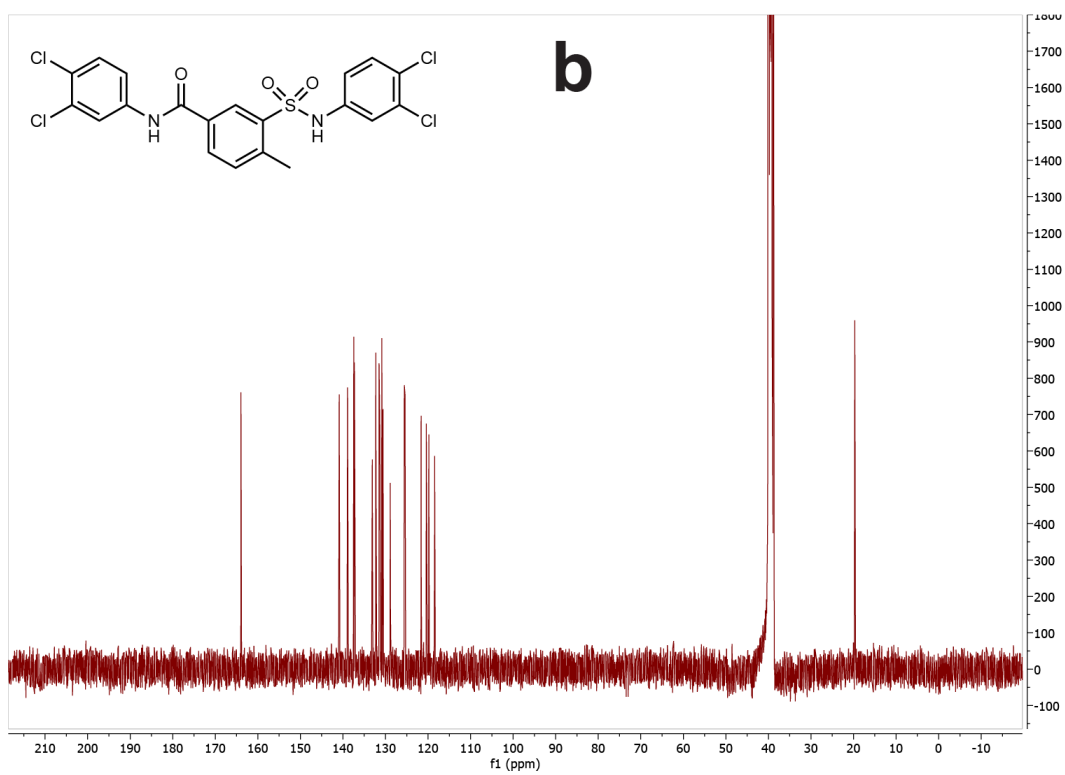

**Supplementary Figure 3. NMR Spectroscopic analysis of JC-229. a** <sup>1</sup>H NMR spectrum of JC-229. **b** <sup>13</sup>C NMR spectrum of JC-229. Source data are provided as a Source Data file.

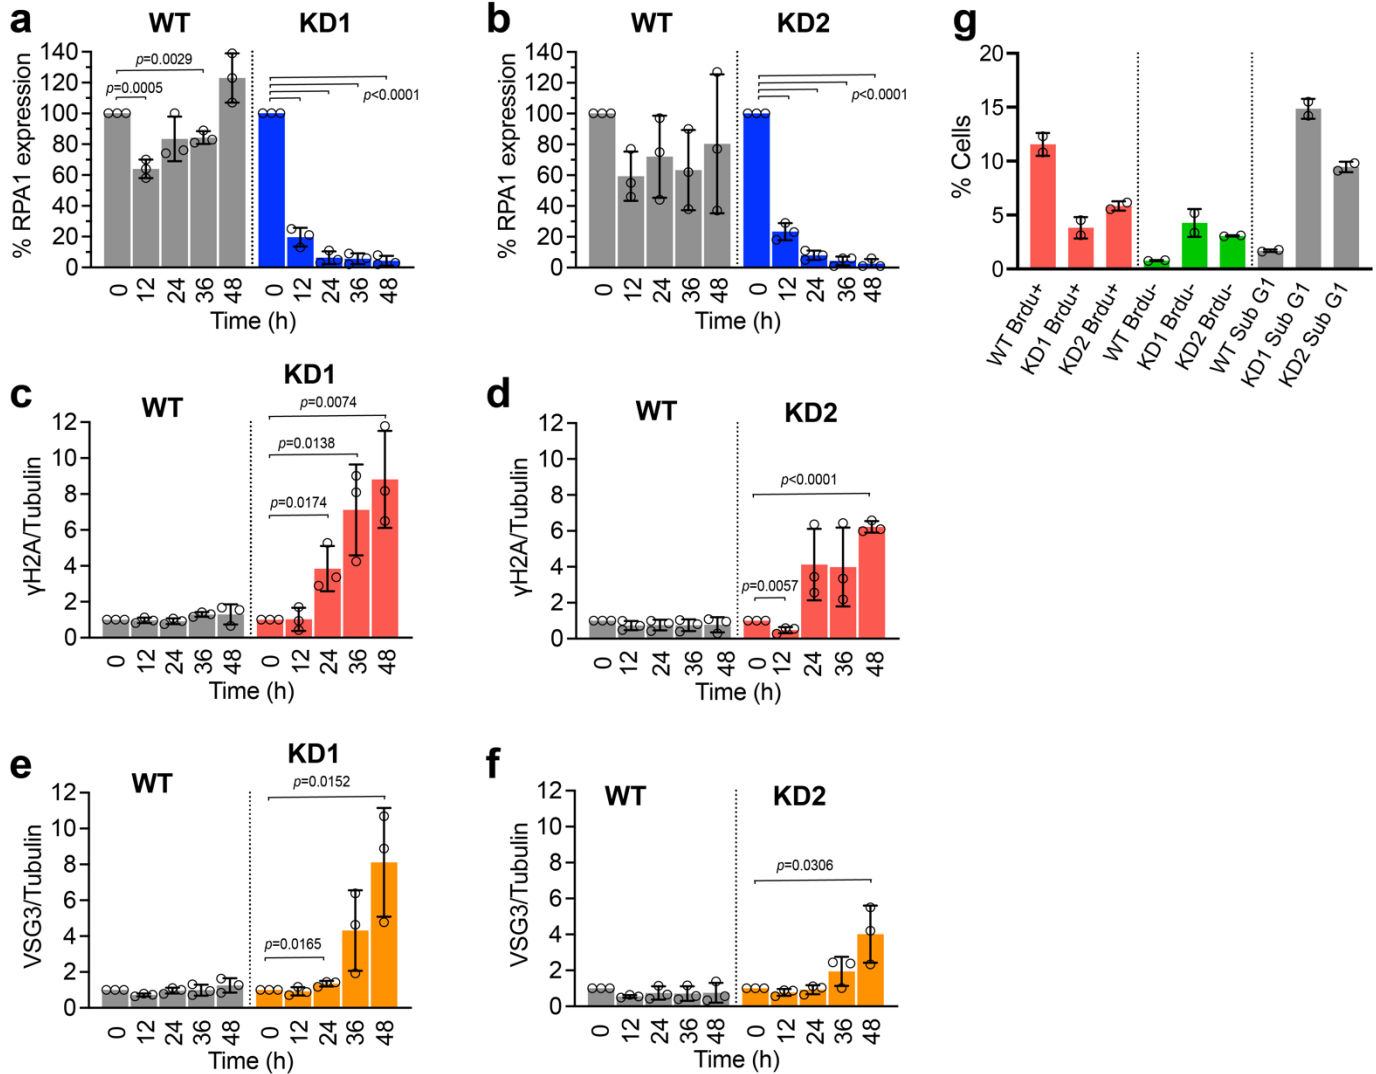

**Supplementary Figure 4. Quantification of protein levels in immunoblots (Fig. 2c) and quantification of BrdU-stained cells (Fig. 2e).** **a, b** % *TbRPA1* protein level in *TbRPA1* KD1 and KD2 cells: Signal intensities of *TbRPA1* bands were quantified using ImageJ software and normalized to those of Tubulin protein bands and fold change was obtained by normalizing to 0 hr time point. **c-f** Fold change of  $\gamma$ H2A (c, d) and VSG3 (e, f):  $\gamma$ H2A and VSG3 bands were analyzed as RPA1 bands and fold changes are plotted. Blots from three independent experiments were quantified for Supplementary Fig. 4a-f (n=3). Error bars indicate mean  $\pm$ SD. An unpaired two-sided Student's t-test was performed. **g** Quantification of BrdU positive (+), BrdU negative (-) and sub-G1 populations in WT, KD1 and KD2 at 24-hour post-RNAi induction. Two independent flow experiments were averaged (n=2). Error bars indicate mean  $\pm$ SD. Source data are provided as a Source Data file.

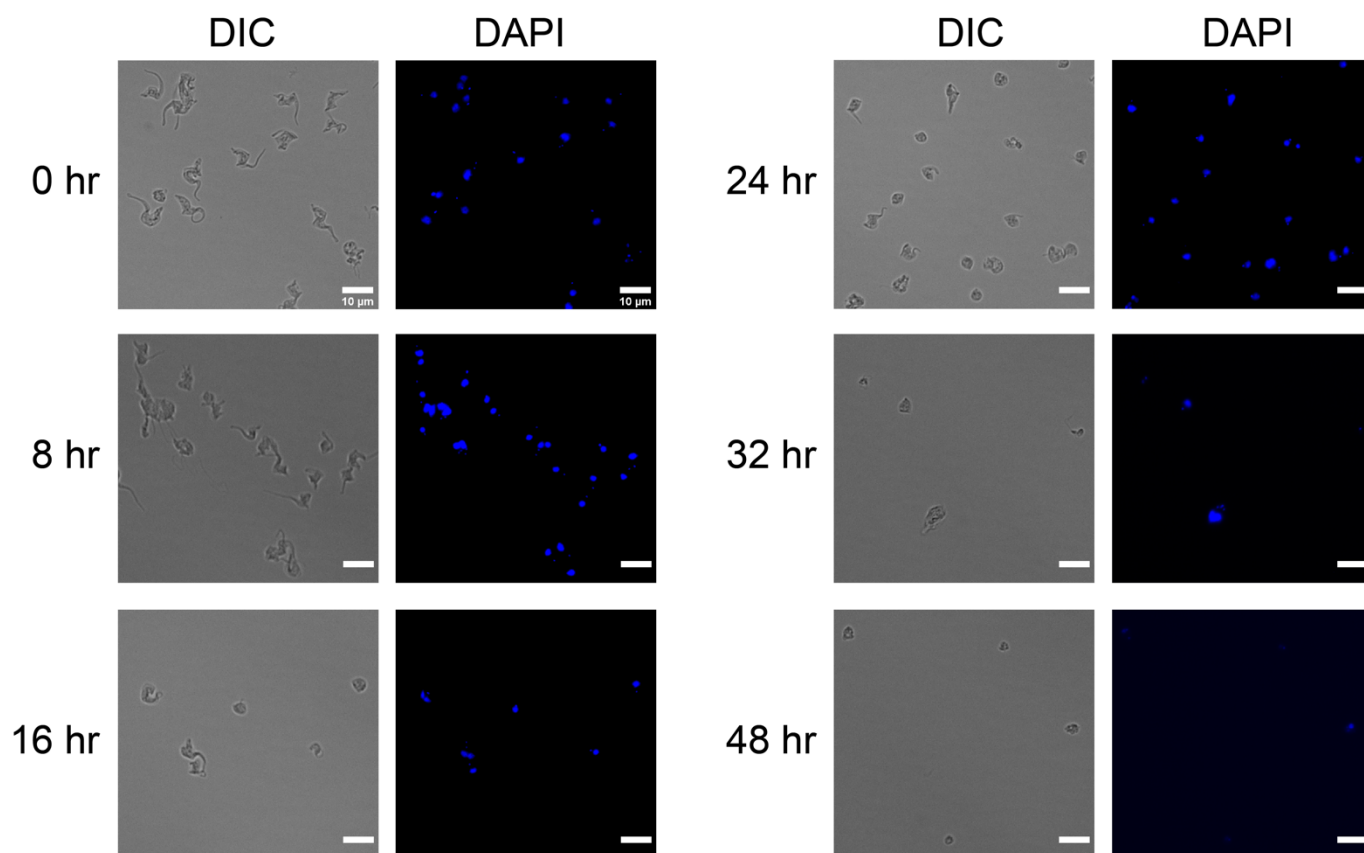

**Supplementary Figure 5. Microscopic analysis of JC-229 treated *T. brucei* cells.** Cells collected at indicated time points were fixed in 1% paraformaldehyde for 10 min and stained with DAPI. Images were obtained from EVOS M5000 microscope. Scale bar, 10 μm. Twenty images were taken for each timepoint with similar results. Source data are provided as a Source Data file.

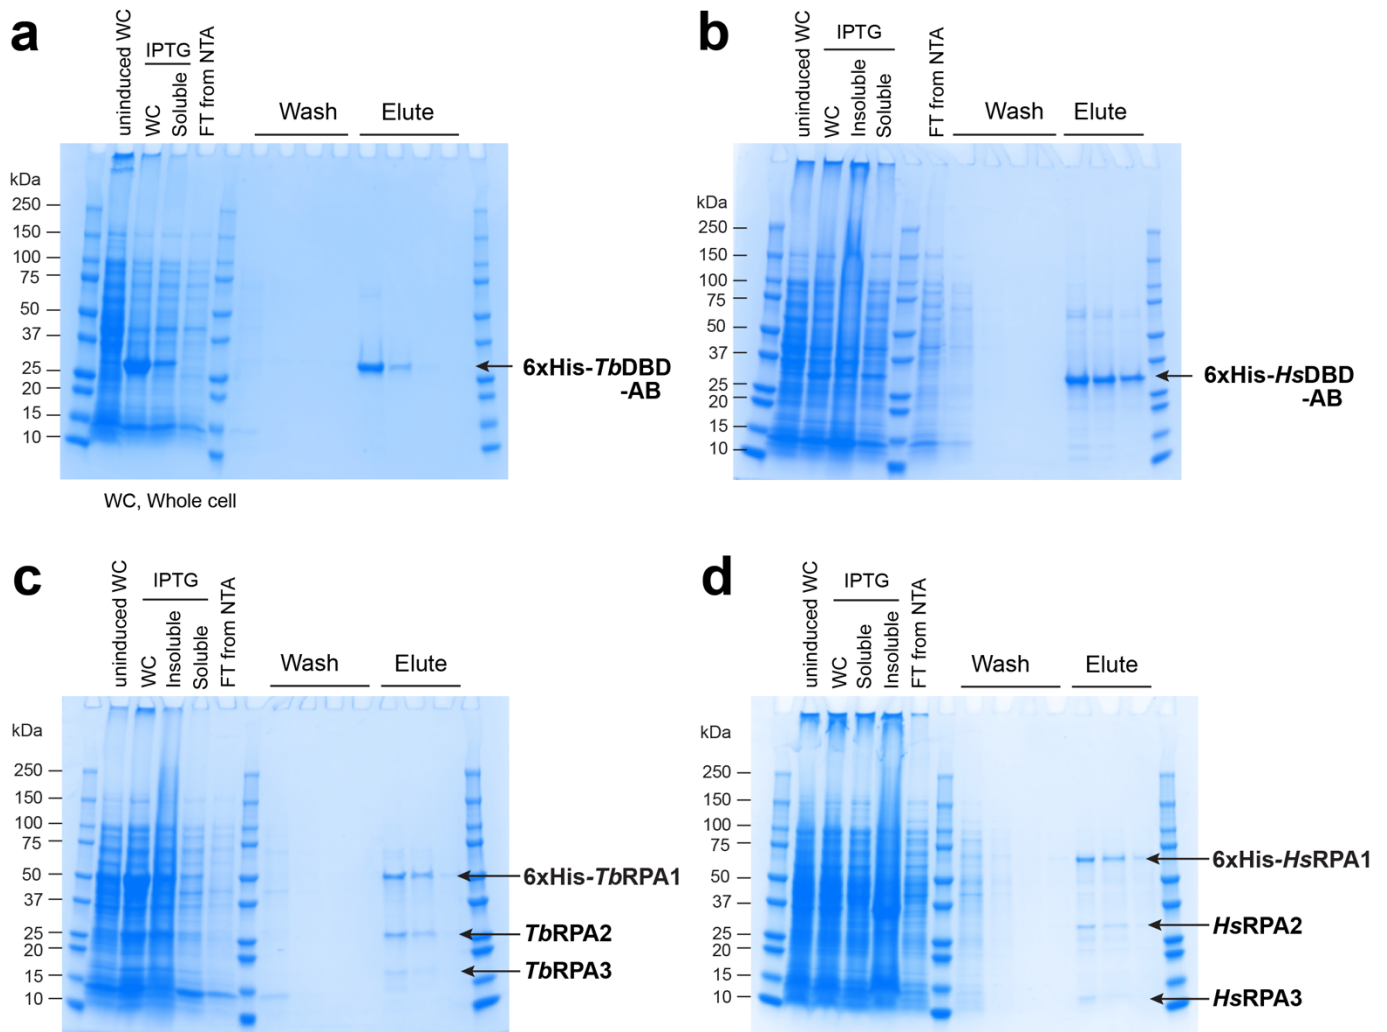

**Supplementary Figure 6. Ni-NTA purification of *TbRPA1* DBD-AB (a), *HsRPA1* DBD-AB (b), *TbRPA* complex (c) and *HsRPA* complex (d) from *E. coli*.** Representative SDS-PAGE gels are shown. WC= whole cell, FT= flow through. Three independent purifications were performed for Supplementary Fig. 6a-d with similar results. Source data are provided as a Source Data file.

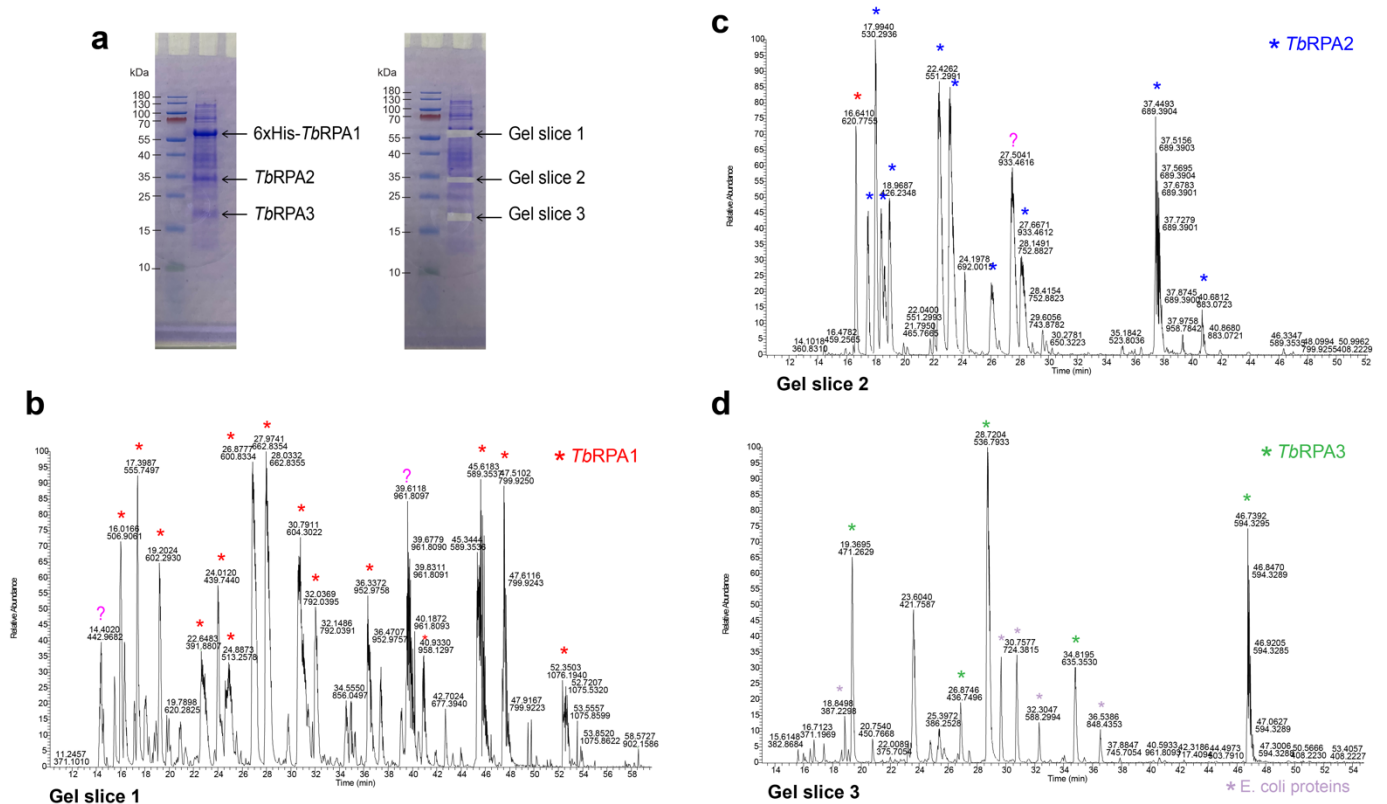

**Supplementary Figure 7. LC-MS/MS of purified *TbRPA* complex.** **a** SDS-PAGE blots showing purified *TbRPA* complex. 6xHis-*TbRPA1*, *TbRPA2*, and *TbRPA3* subunits are indicated with arrows. Gel slices containing these proteins were analyzed by mass spectrometry. **b-d** LC-MS/MS data analysis. A representative nano LC-MS/MS base peak chromatogram, showing the detection of signature peptides for *TbRPA1*, *TbRPA2* and *TbRPA3* (shown in red, blue, and green asterisks, respectively). Source data are provided as a Source Data file.



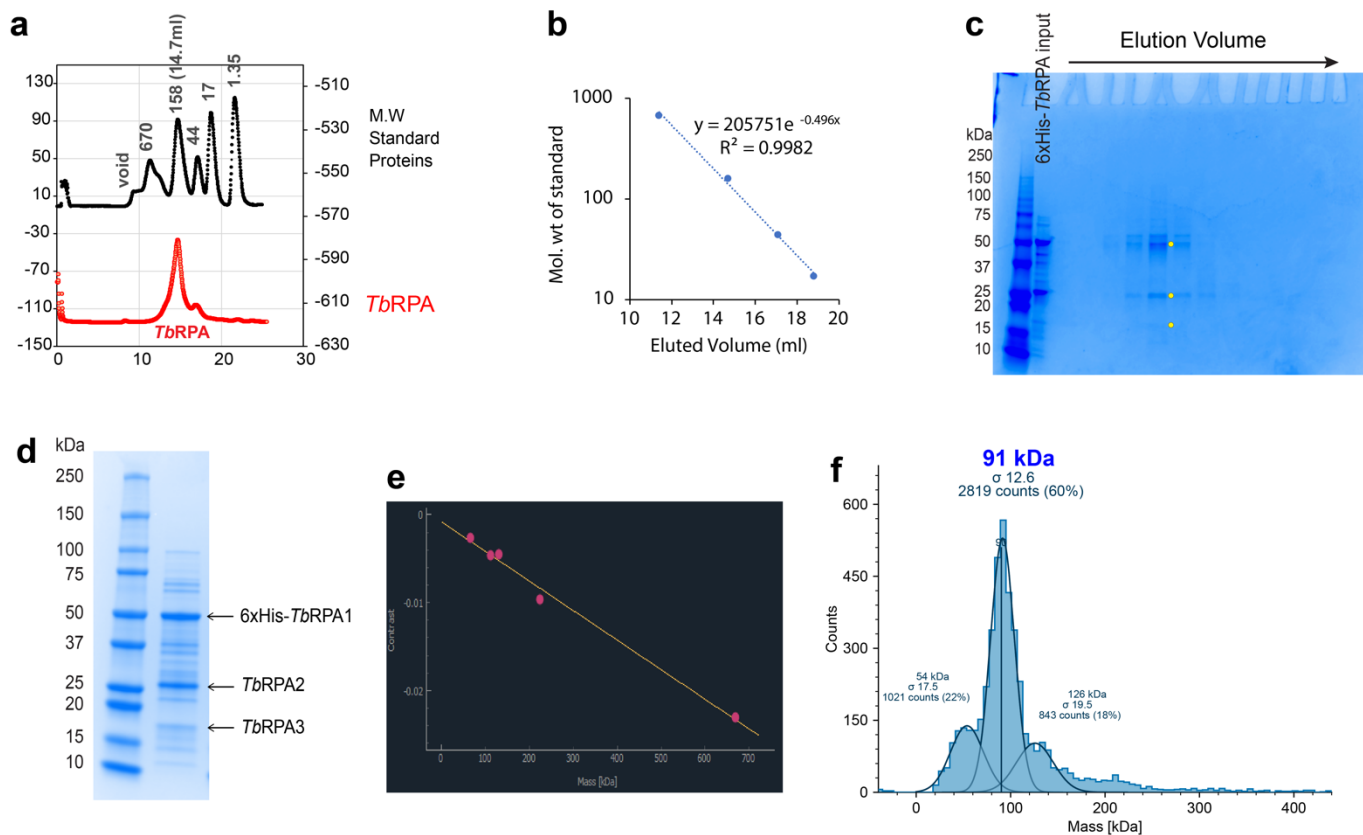

**Supplementary Figure 8. Size exclusion chromatography (SEC) and mass photometry (MP) of purified *TbRPA* complex.** **a-c** Size exclusion chromatography. **a** Purified *TbRPA* complex was loaded onto a Superdex 200 10/300 column using ÄKTA chromatography system. SEC shows a major peak at an estimated molecular weight of 142 kDa (shown in red). Gel filtration calibration standard containing thyroglobulin (670 kDa), bovine  $\gamma$  globulin (158 kDa), chicken ovalbumin (44 kDa), equine myoglobin (17 kDa), and vitamin B12 (1.35 kDa) was separated using the same column to estimate the size of *TbRPA* complex. **b** A standard curve generated from protein markers using their eluted volume. **c** SDS-PAGE gel analysis of eluted fractions of *TbRPA* sample from SEC. The experiment was performed two times with similar results. **d-f** Mass photometry. **d** SDS-PAGE blot showing purified *TbRPA* complex used for MP analysis. Three independent experiments were performed with similar results. **e** A calibration curve generated from molecular standards. **f** Histogram of population distribution of purified *TbRPA*. The molecular weight of *TbRPA* is estimated to be ~91 kDa from the calibration counts in e. Source data are provided as a Source Data file.

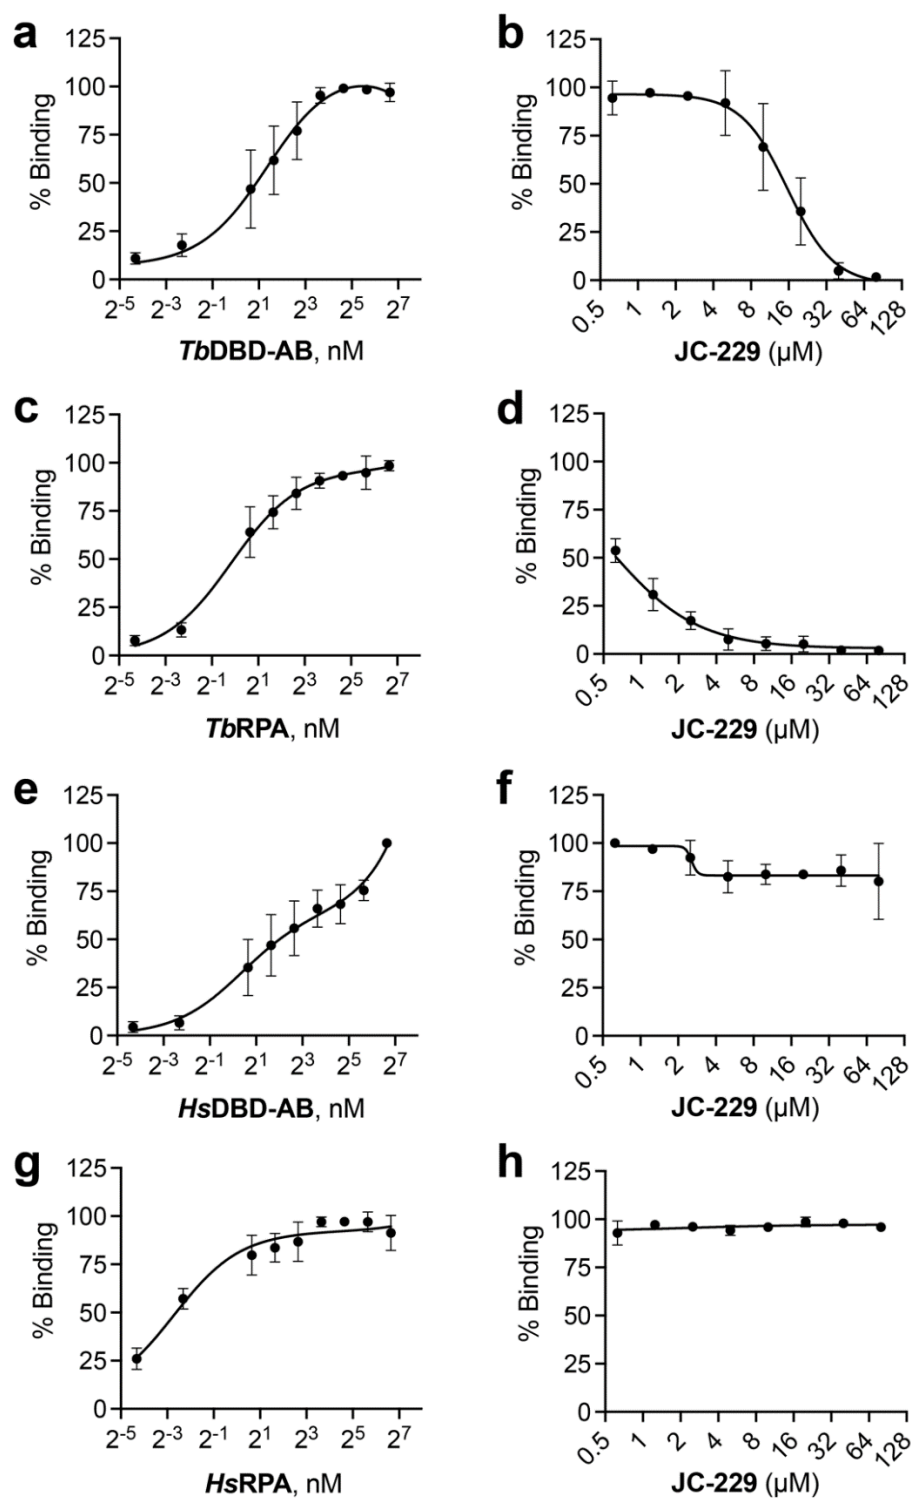

**Supplementary Figure 9. Quantification of RPA-ssDNA complexes on EMSA gels in Fig. 4.** Levels of protein-ssDNA complexes in EMSA gels were quantified using ImageJ software and plotted. **a, b** *Tb*RPA1 DBD-AB (**a**: ssDNA binding, **b**: inhibition by *JC*-229). **c, d** *Tb*RPA complex (**c**: ssDNA binding, **d**: inhibition by *JC*-229). **e, f** *Hs*RPA1 DBD-AB (**e**: ssDNA binding, **f**: inhibition by *JC*-229). **g, h** *Hs*RPA complex (**g**: ssDNA binding, **h**: inhibition by *JC*-229). EMSA gels from three independent experiments were quantified (n=3) by using ImageJ. Error bars indicate mean ±SD. Source data are provided as a Source Data file.

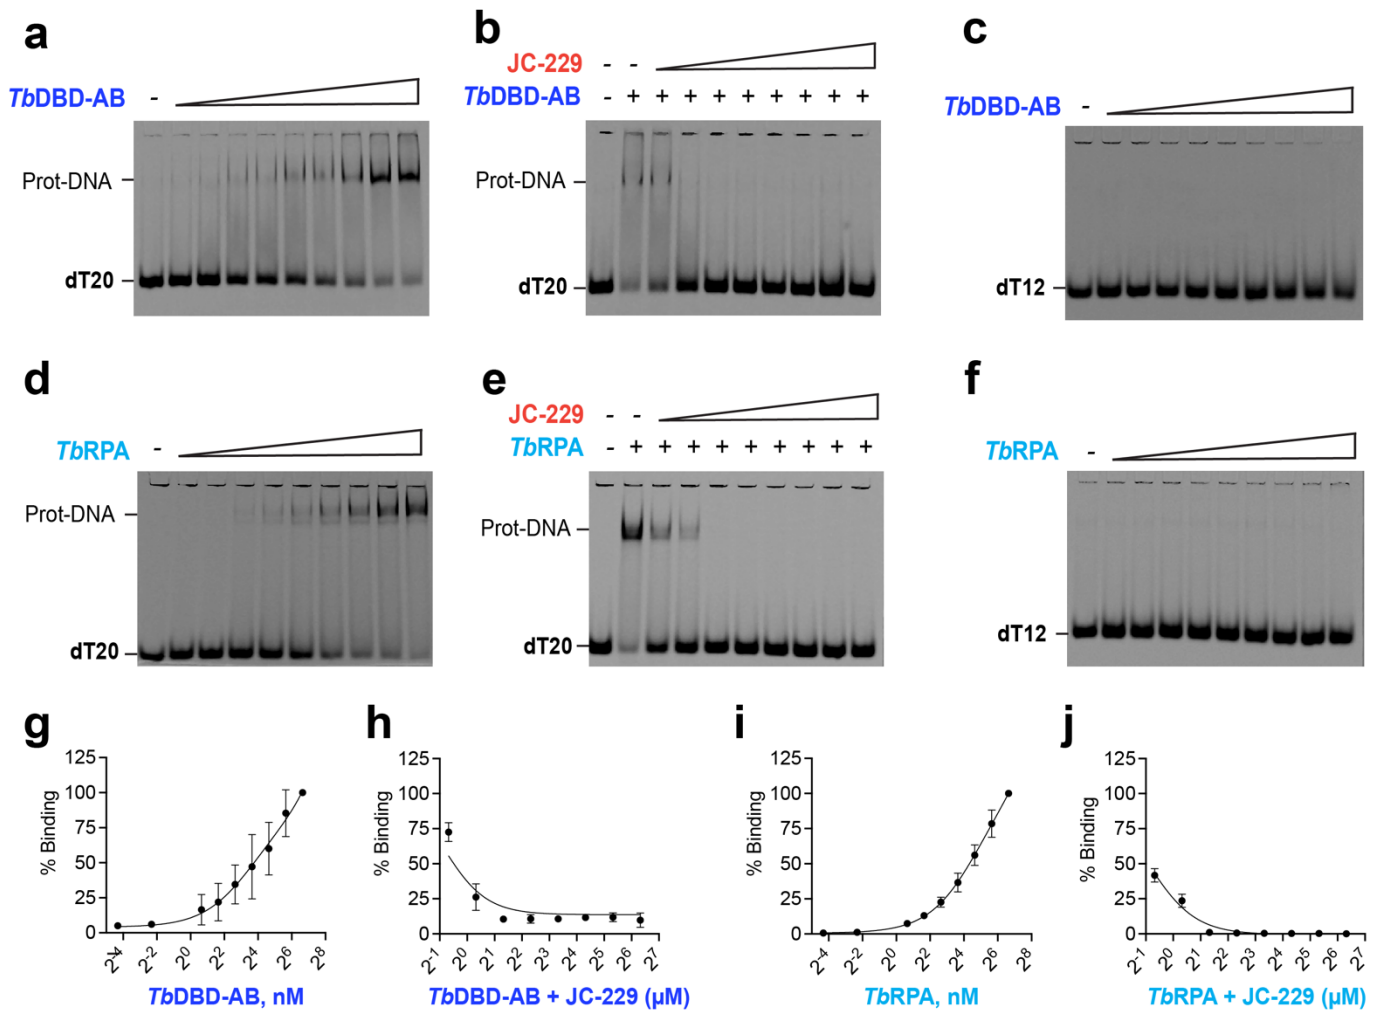

**Supplementary Figure 10. ssDNA-binding activities of *Tb*RPA1 DBD-AB and *Tb*RPA complex with shorter ssDNA substrates and JC-229 inhibition (by EMSA).** **a** Binding of *Tb*RPA1 DBD-AB with dT<sub>20</sub>. Serial dilutions (0.05, 0.2, 1.6, 3.2, 6.25, 12.5, 25, 50 and 100 nM) of *Tb*RPA1 DBD-AB were incubated with 2 nM 5'IRDye800-dT<sub>20</sub> and samples were analyzed by EMSA. **b** Inhibition of *Tb*DBD-AB's interaction with dT<sub>20</sub> by JC-229. Serial dilutions (0.625, 1.25, 2.5, 5, 10, 20, 40 and 80 μM) of JC-229 were pre-incubated with 12.5 nM *Tb*RPA1 DBD-AB protein, then incubated with 5'IRDye800-dT<sub>20</sub>. Inhibition of binding was visualized by EMSA. **c** Binding of *Tb*RPA1 DBD-AB with dT<sub>12</sub>. **d** Binding of *Tb*RPA complex with dT<sub>20</sub>. **e** Inhibition of *Tb*RPA complex's interaction with dT<sub>20</sub> by JC-229. **f** Binding of *Tb*RPA complex with dT<sub>12</sub>. The ssDNA-binding assay was performed as in **a** and the inhibition assay as in **b**. **g-j** Quantification of protein-ssDNA complexes in EMSA gels (**a**, **b**, **d**, and **e**, respectively) using ImageJ software. EMSA gels from three independent experiments were quantified (n=3) by using ImageJ. Error bars indicate mean ±SD. Source data are provided as a Source Data file.

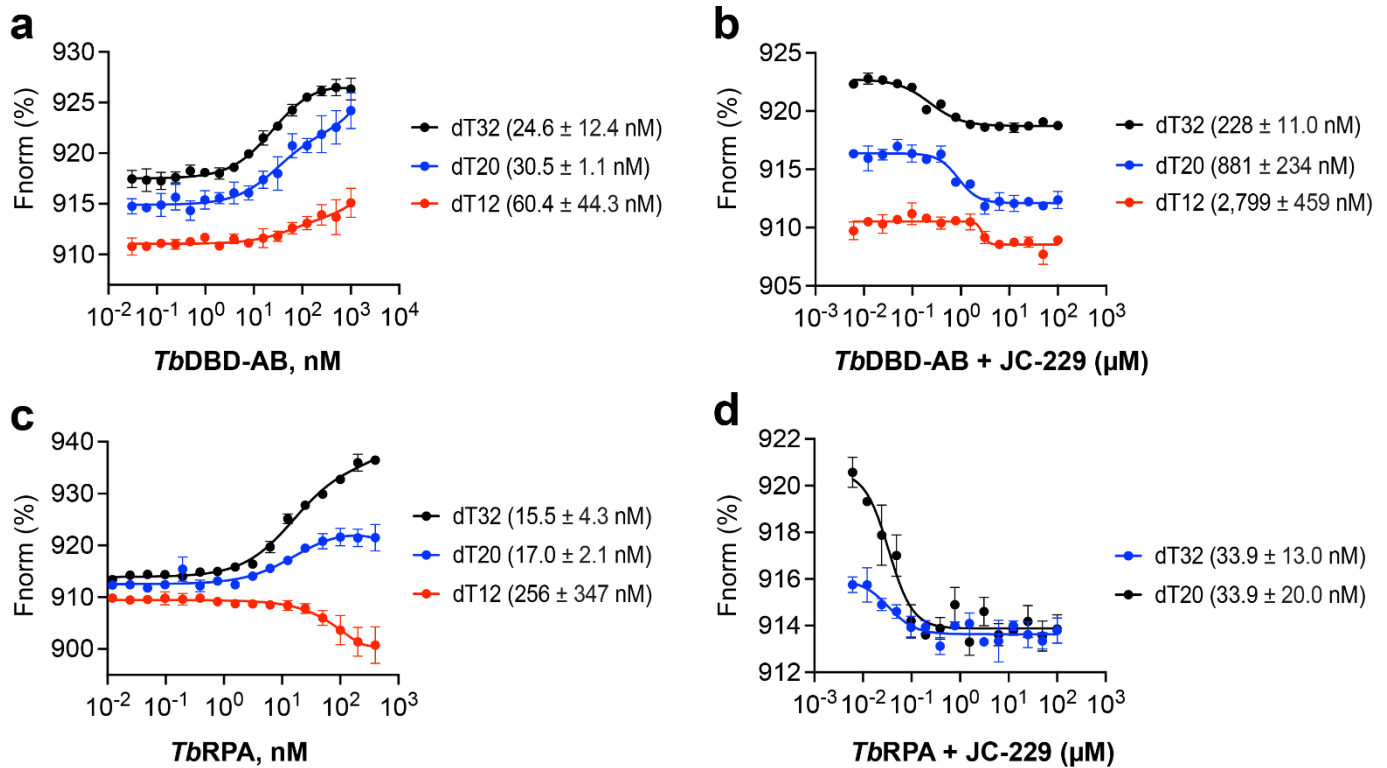

**Supplementary Figure 11. ssDNA-binding activities of *TbRPA1* DBD-AB and *TbRPA* complex with shorter ssDNA substrates and JC-229 inhibition (by MST).** The MST assay was performed as described in Fig. 5. **a** Comparison of ssDNA-binding activities of *TbRPA1* DBD-AB with oligo probes of different lengths, dT<sub>32</sub>, dT<sub>20</sub>, or dT<sub>12</sub>. **b** Comparison of JC-229 inhibition on *TbRPA1* DBD-AB's ssDNA binding with dT<sub>32</sub>, dT<sub>20</sub>, or dT<sub>12</sub>. 30 nM of purified protein was used. **c** Comparison of ssDNA-binding activities of *TbRPA* complex with oligo probes of different lengths, dT<sub>32</sub>, dT<sub>20</sub>, or dT<sub>12</sub>. **d** Comparison of JC-229 inhibition on *TbRPA* complex's ssDNA binding with dT<sub>32</sub> or dT<sub>20</sub>. 25 nM of purified complex was used. Binding with dT<sub>32</sub>, dT<sub>20</sub> and dT<sub>12</sub> are shown in black, blue, and red respectively. Three independent MST experiments were performed (n=3). Error bars indicate mean ±SD. Statistical analysis and plotting were performed with GraphPad Prism software.  $K_d$  and IC<sub>50</sub> values were obtained with a one site binding total and standard 4-PL curve respectively. Source data are provided as a Source Data file.

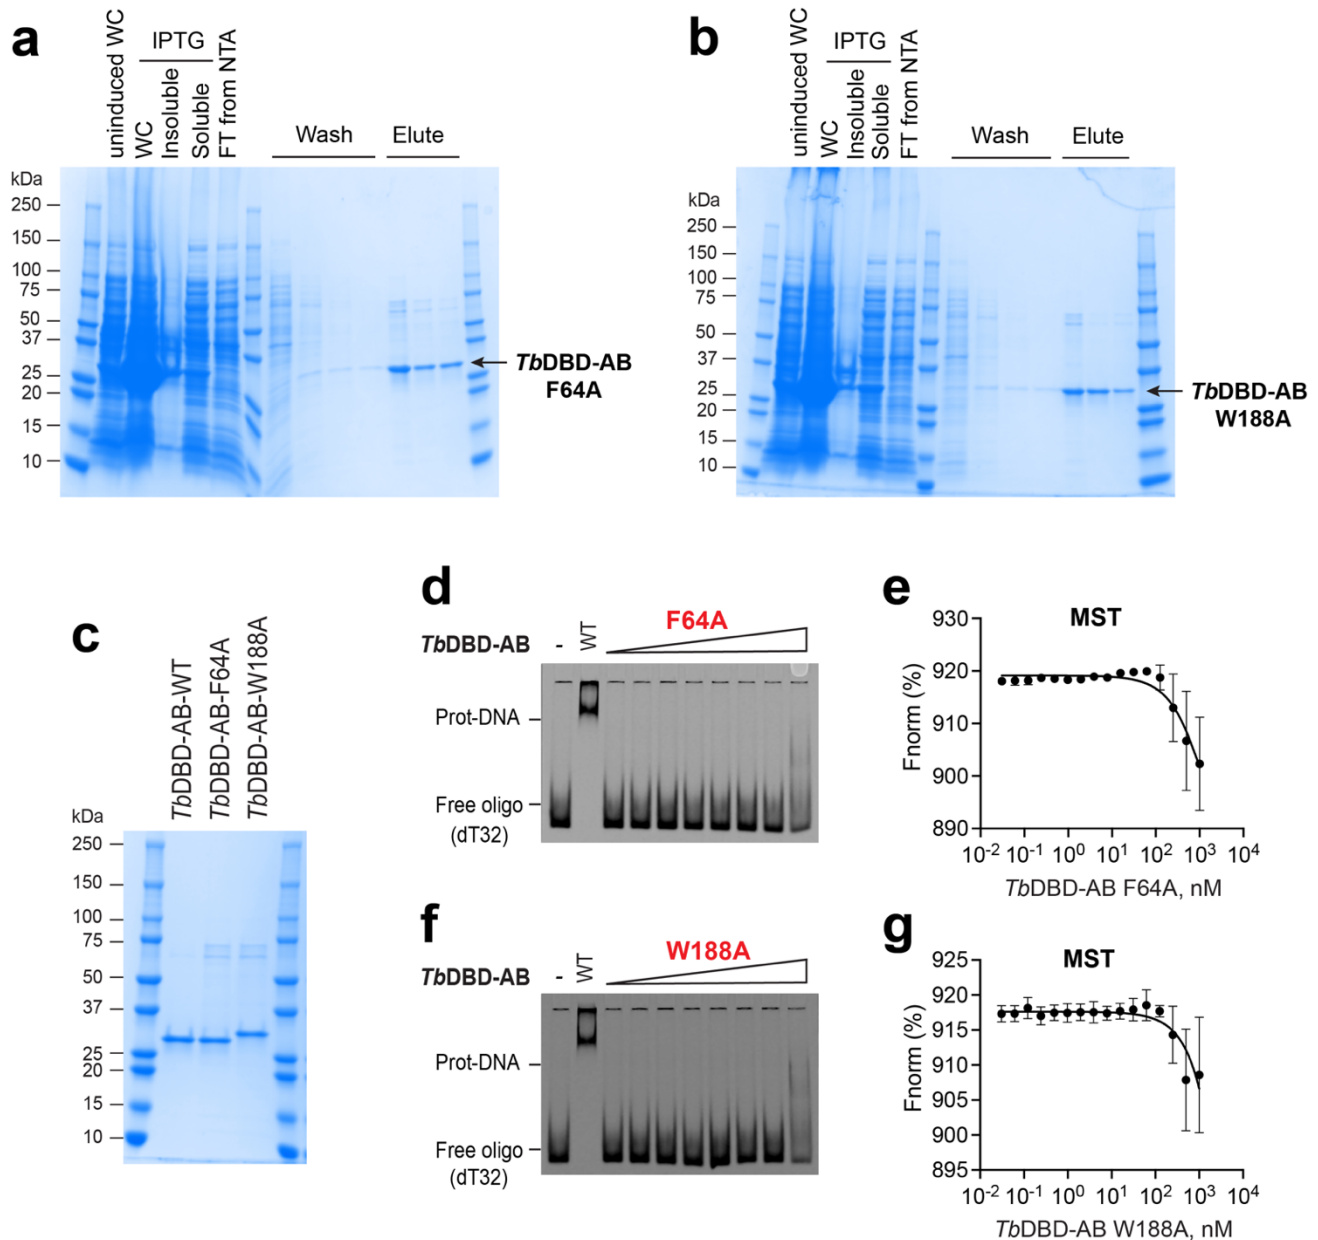

**Supplementary Figure 12. ssDNA-binding activity of *Tb*RPA1 DBD-AB F64A and W188A mutants.**

**a, b** Ni-NTA purification of *Tb*RPA1 DBD-AB F64A (a) and W188A (b) mutant proteins from *E. coli*. Representative SDS-PAGE gels are shown. **c** SDS-PAGE gel showing purified fractions of *Tb*RPA1 DBD-AB WT, F64A, and W188A used in ESMA and MST assays. **d** EMSA with recombinant *Tb*RPA1 DBD-AB F64A. Serial dilutions (0, 1.6, 3.2, 6.25, 12.5, 25, 50 and 100 nM) of *Tb*RPA1 DBD-AB F64A were incubated with 2 nM 5'IRDye800-dT<sub>32</sub> and samples were analyzed by EMSA. The second lane is wild-type *Tb*RPA1 DBD-AB control (12.5 nM). **e** MST assay with recombinant *Tb*RPA1 DBD-AB F64A. Increasing concentrations of *Tb*RPA1 DBD-AB F64A (2-fold serially diluted starting with a 1000 nM concentration) were incubated with 10 nM 5'Cy5-dT<sub>32</sub> and RPA-ssDNA binding was examined by MST. **f** EMSA with recombinant *Tb*RPA1 DBD-AB W188A (performed as in d). Three independent EMSA experiments were performed for Supplementary Fig. 12d, f with similar results. **g** MST assay with recombinant *Tb*RPA1 DBD-AB W188A (performed as in e). Three independent MST assays were performed for Supplementary Fig. 12e, g (n=3). Error bars indicate mean ±SD. Source data are provided as a Source Data file.

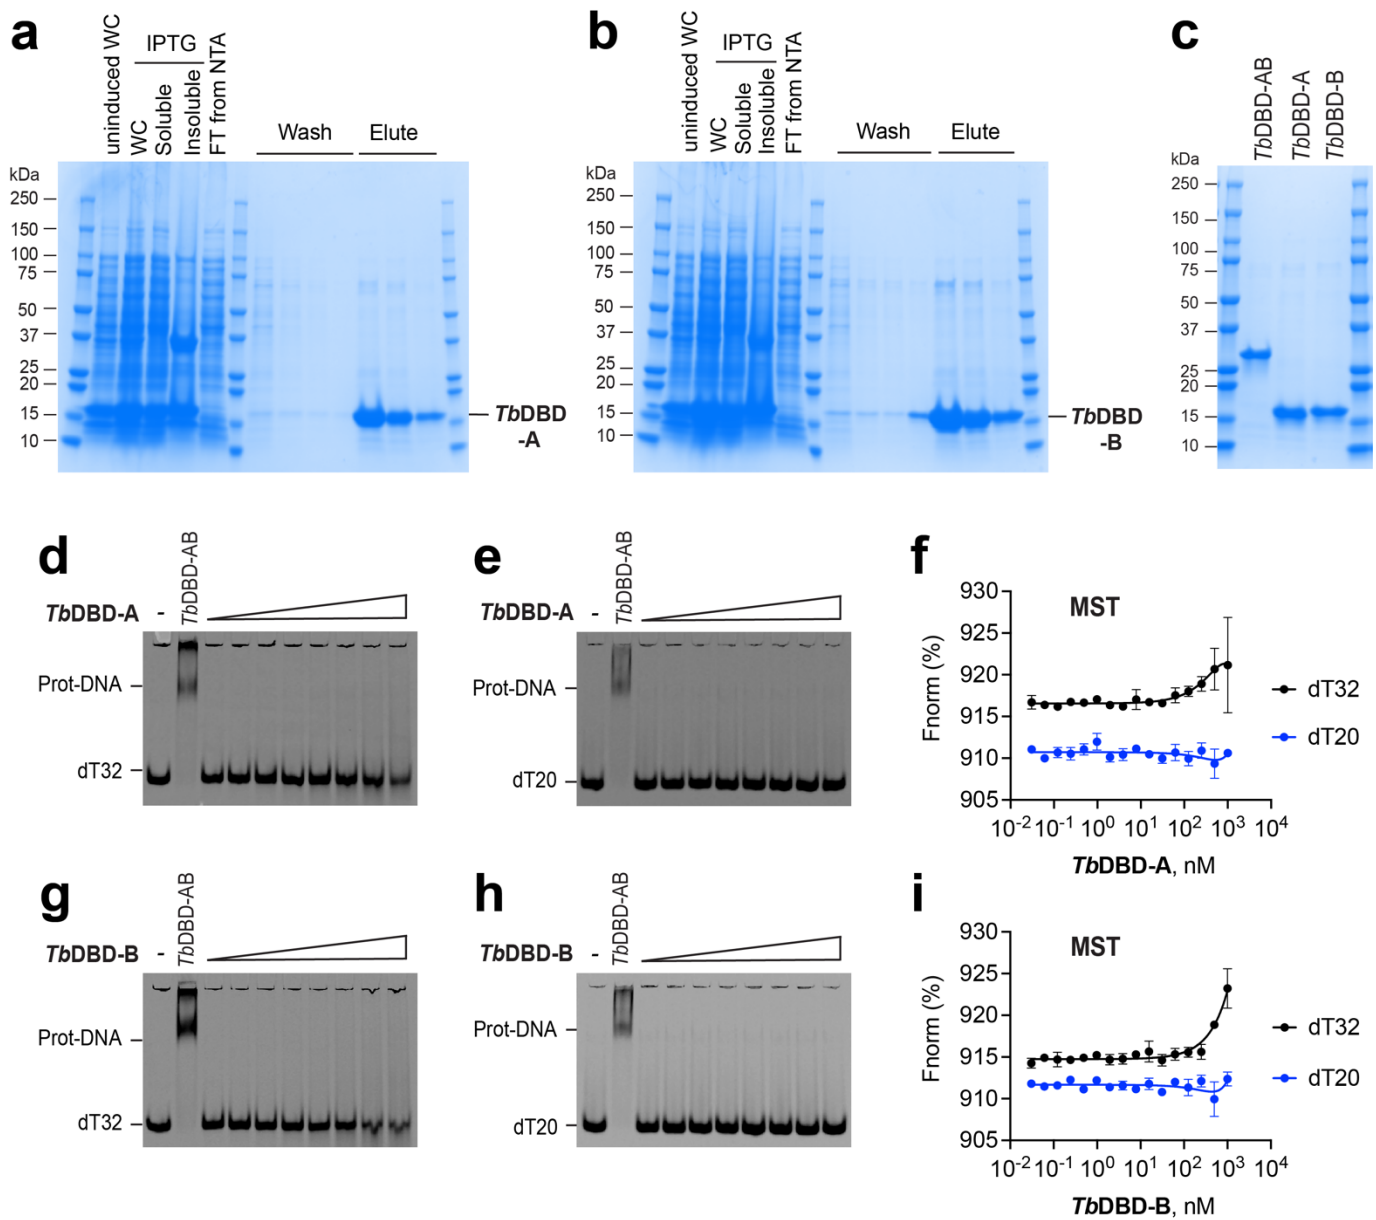

**Supplementary Figure 13. ssDNA-binding activity of *TbRPA1* DBD-A and *TbRPA1* DBD-B.** **a, b** Ni-NTA purification of *TbRPA1* DBD-A (**a**) and DBD-B (**b**) mutant proteins from *E. coli*. Representative SDS-PAGE gels are shown. **c** SDS-PAGE gel showing purified fractions of *TbRPA1* DBD-AB, DBD-A, and DBD-B used in ESMA and MST assays. **d, e** EMSA with recombinant *TbRPA1* DBD-A. Serial dilutions (0, 4.67, 9.38, 18.75, 37.5, 75, 150 and 300 nM) of *TbRPA1* DBD-A were incubated with 2 nM 5'IRDye800-dT<sub>32</sub> (**d**) or dT<sub>20</sub> (**e**) and samples were analyzed by EMSA. The second lane is wild-type *TbRPA1* DBD-AB control (150 nM). **f** MST assay with recombinant *TbRPA1* DBD-A. Increasing concentrations of *TbRPA1* DBD-A (2-fold serially diluted starting with a 1000 nM concentration) were incubated with 10 nM 5'Cy5-dT<sub>32</sub> (black) or dT<sub>20</sub> (blue) and ssDNA binding was examined by MST. **g, h** EMSA with recombinant *TbRPA1* DBD-B (performed as in **d** and **e**). **i** MST assay with recombinant *TbRPA1* DBD-B (performed as in **f**). Three independent EMSA experiments were performed for Supplementary Fig. 13d, e, g, h with similar results. Three independent MST assays were performed for Supplementary Fig 13f, i. Error bars indicate mean  $\pm$ SD. Statistical analysis and plotting of MST data were performed with GraphPad Prism software.  $K_d$  values were obtained with a one site binding total curve. Source data are provided as a Source Data file.

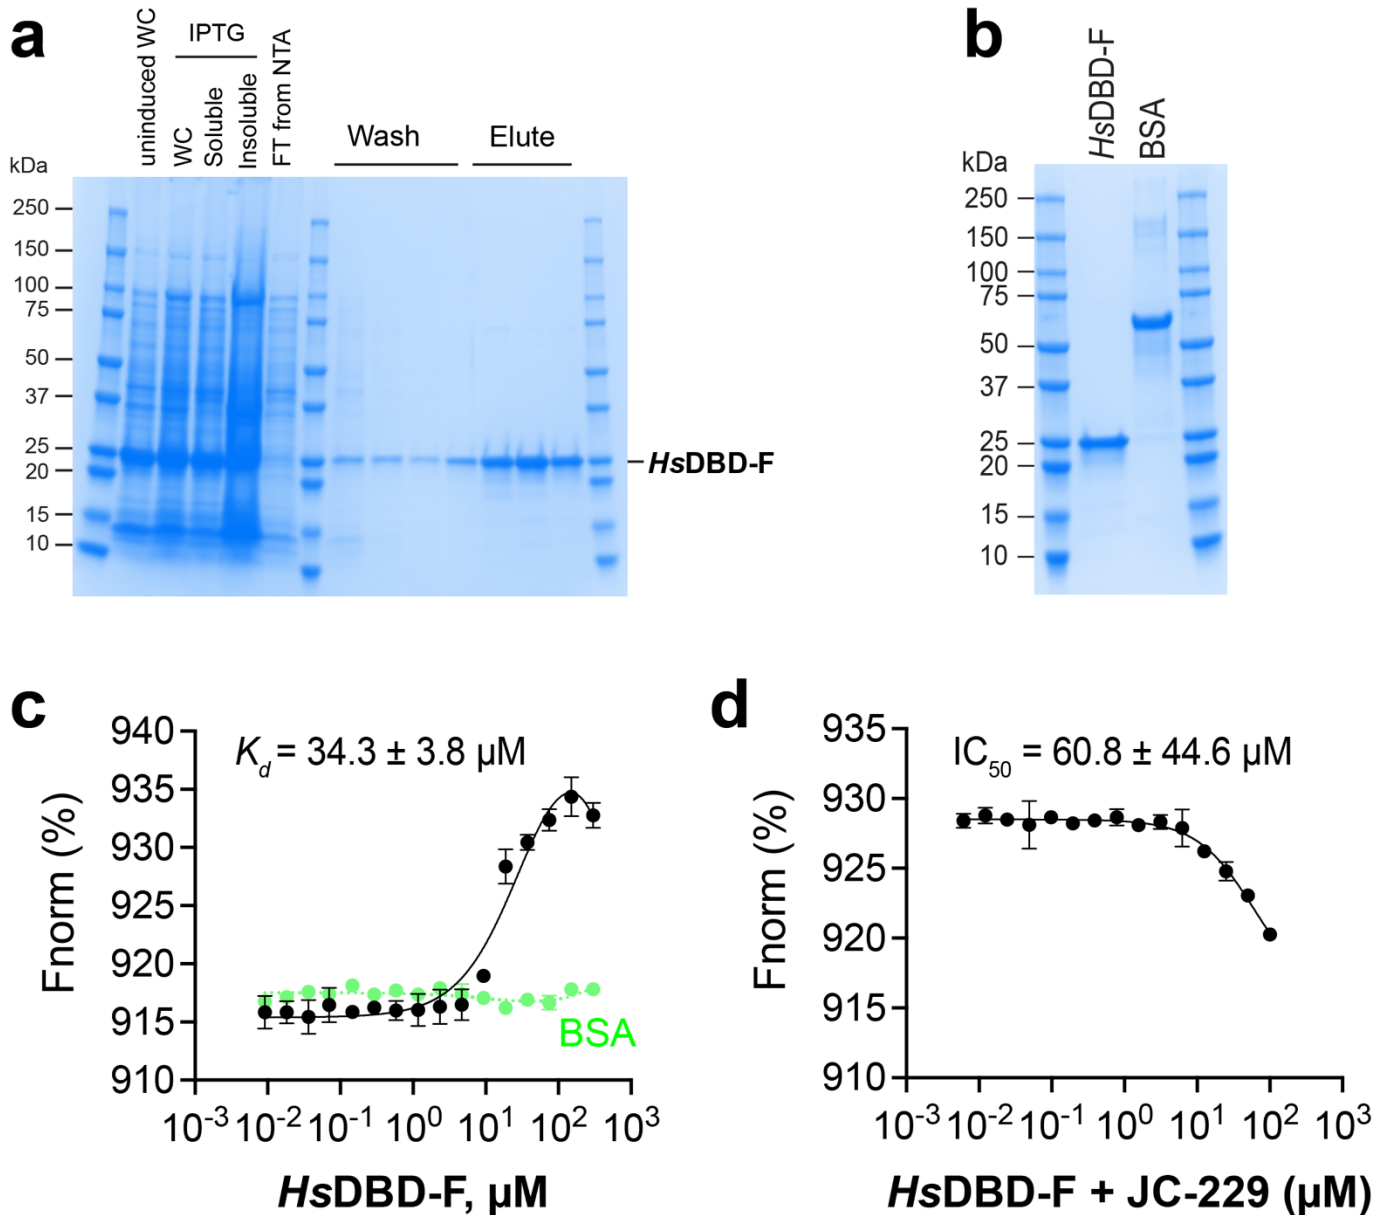

**Supplementary Figure 14. HsDBD-F interaction with ATRIP- $\epsilon$ -Acp-Cy5 peptide and JC-229 inhibition.** **a** Ni-NTA purification of HsRPA1 DBD-F protein from *E. coli*. Representative SDS-PAGE gel is shown. **b** An SDS-PAGE gel showing proteins used for MST assays. **c** Binding of recombinant HsDBD-F with ATRIP peptide. HsDBD-F proteins (or BSA) were 2-fold serially diluted starting with a 300  $\mu\text{M}$  concentration and then incubated with 50 nM Cy5-labeled ATRIP peptide. Binding was analyzed by MST. **d** Inhibition of HsDBD-F and ATRIP interaction by JC-229. Serial dilutions of JC-229 were pre-incubated with 20  $\mu\text{M}$  HsDBD-F protein and then with 50 nM Cy5-labeled ATRIP peptide. Three independent MST experiments were performed for Supplementary Fig. 14c, d ( $n=3$ ). Error bars indicate mean  $\pm$ SD. Statistical analysis and plotting of MST data were performed with GraphPad Prism software.  $K_d$  and  $IC_{50}$  values were obtained with a one site binding total and standard 4-PL curve respectively. Source data are provided as a Source Data file.

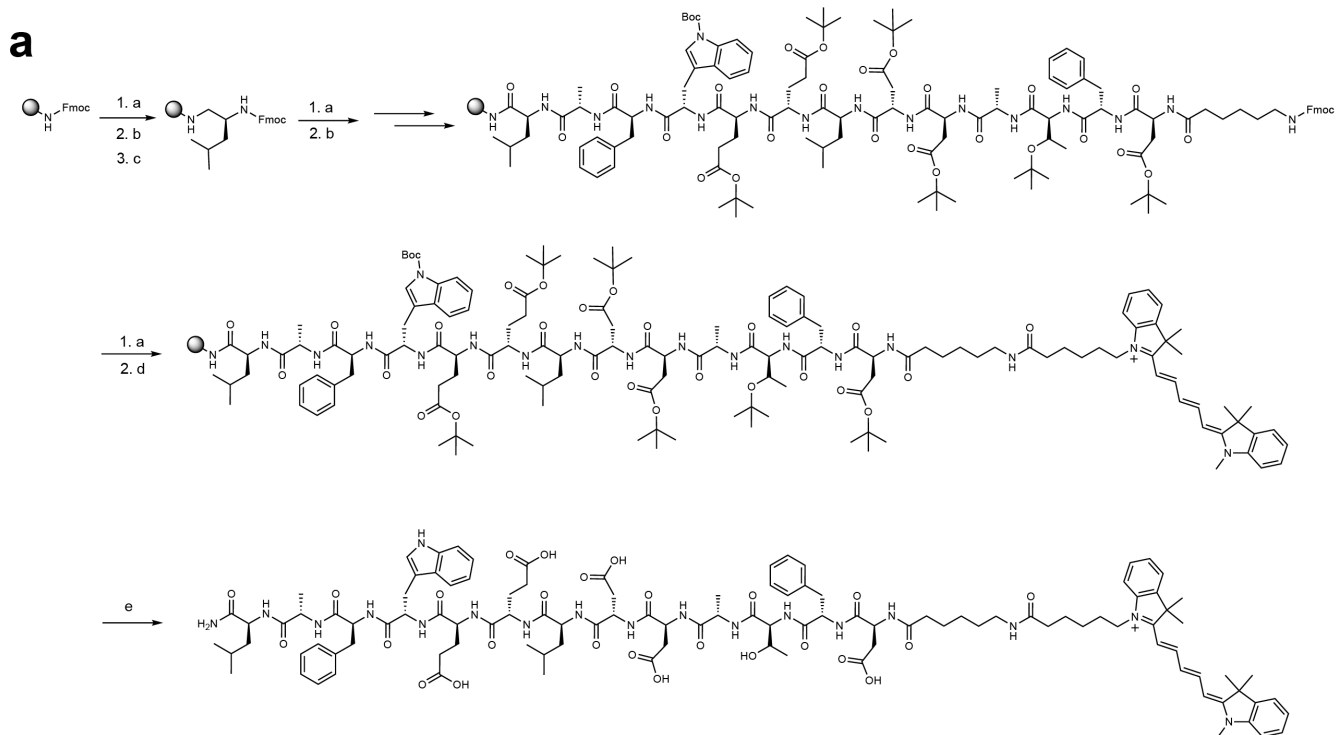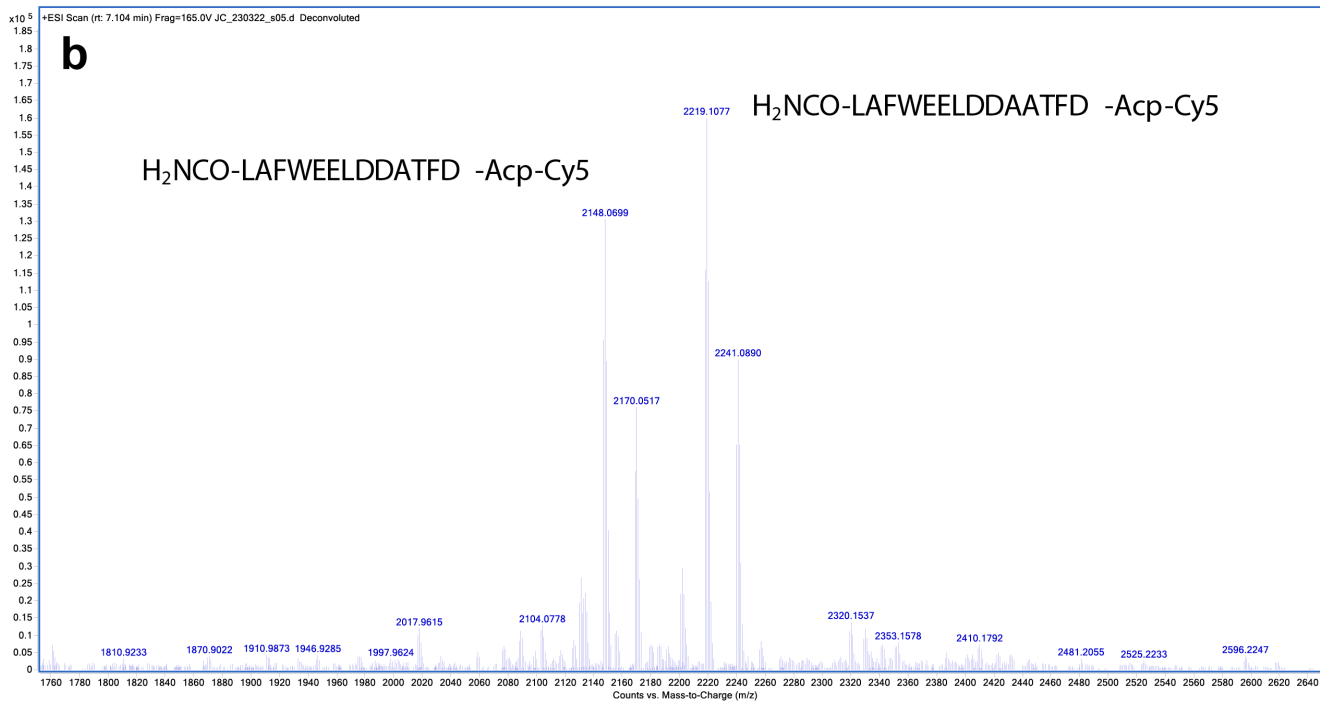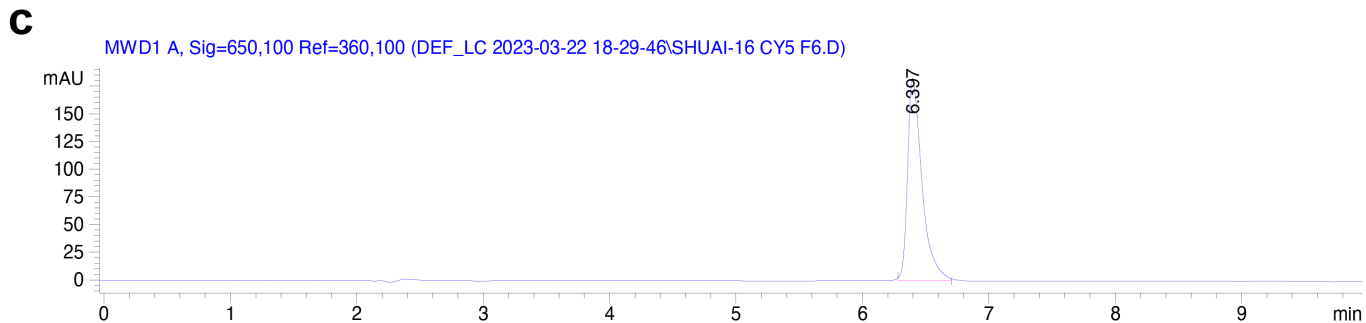



**Supplementary Figure 15. Synthesis of ATRIP- $\epsilon$ -Acp-Cy5 peptide** (see the methods section for more details). **a** Reagents and conditions: (a) 20% piperidine/DMF(v/v) (25 °C, 2 x 30 min incubation). (b) Fmoc-Leu-OH (5 eq.), HOBt (5 eq.), HATU (5 eq.) in 10% DIPEA/DMF(v/v) (25 °C, 2.5 hours). (c) acetic anhydride/DIPEA/DMF (3:2:5, v/v/v), 25 °C, 30 min; repeat (a) and (b) with the following Fmoc-protected amino acids in sequence: Fmoc-Ala-OH, Fmoc-Phe-OH, Fmoc-Trp(Boc)-OH, Fmoc-Glu(OtBu)-OH, Fmoc-Glu(OtBu)-OH, Fmoc-Leu-OH, Fmoc-Asp(OtBu)-OH, Fmoc-Asp(OtBu)-OH, Fmoc-Ala-OH, Fmoc-Thr(OtBu)-OH, Fmoc-Phe-OH, Fmoc-Asp(OtBu)-OH, and Fmoc- $\epsilon$ -Acp-OH. (d) Cy5-NHS ester (1.2 eq.) in 20% DIPEA/DMF(v/v) (25 °C, 6 hours in dark). (e) TFA/TIPS/H<sub>2</sub>O (95:2.5:2.5, v/v/v) (25 °C, 2 hours). **b** High-resolution mass spectrum. There are two major compounds with *m/z* 2,148 and 2,219 (2,170 and 2,241 are the Na adduct to 2,148 and 2,219). 2,148 shows the desired ATRIP peptide, and 2,219 is an ATRIP peptide with one additional Alanine. **c** Liquid Chromatography trace of the synthesized ATRIP peptides. Acp: epsilon-amino-hexanoyl, Cy5: cyanine-5. Source data are provided as a Source Data file.

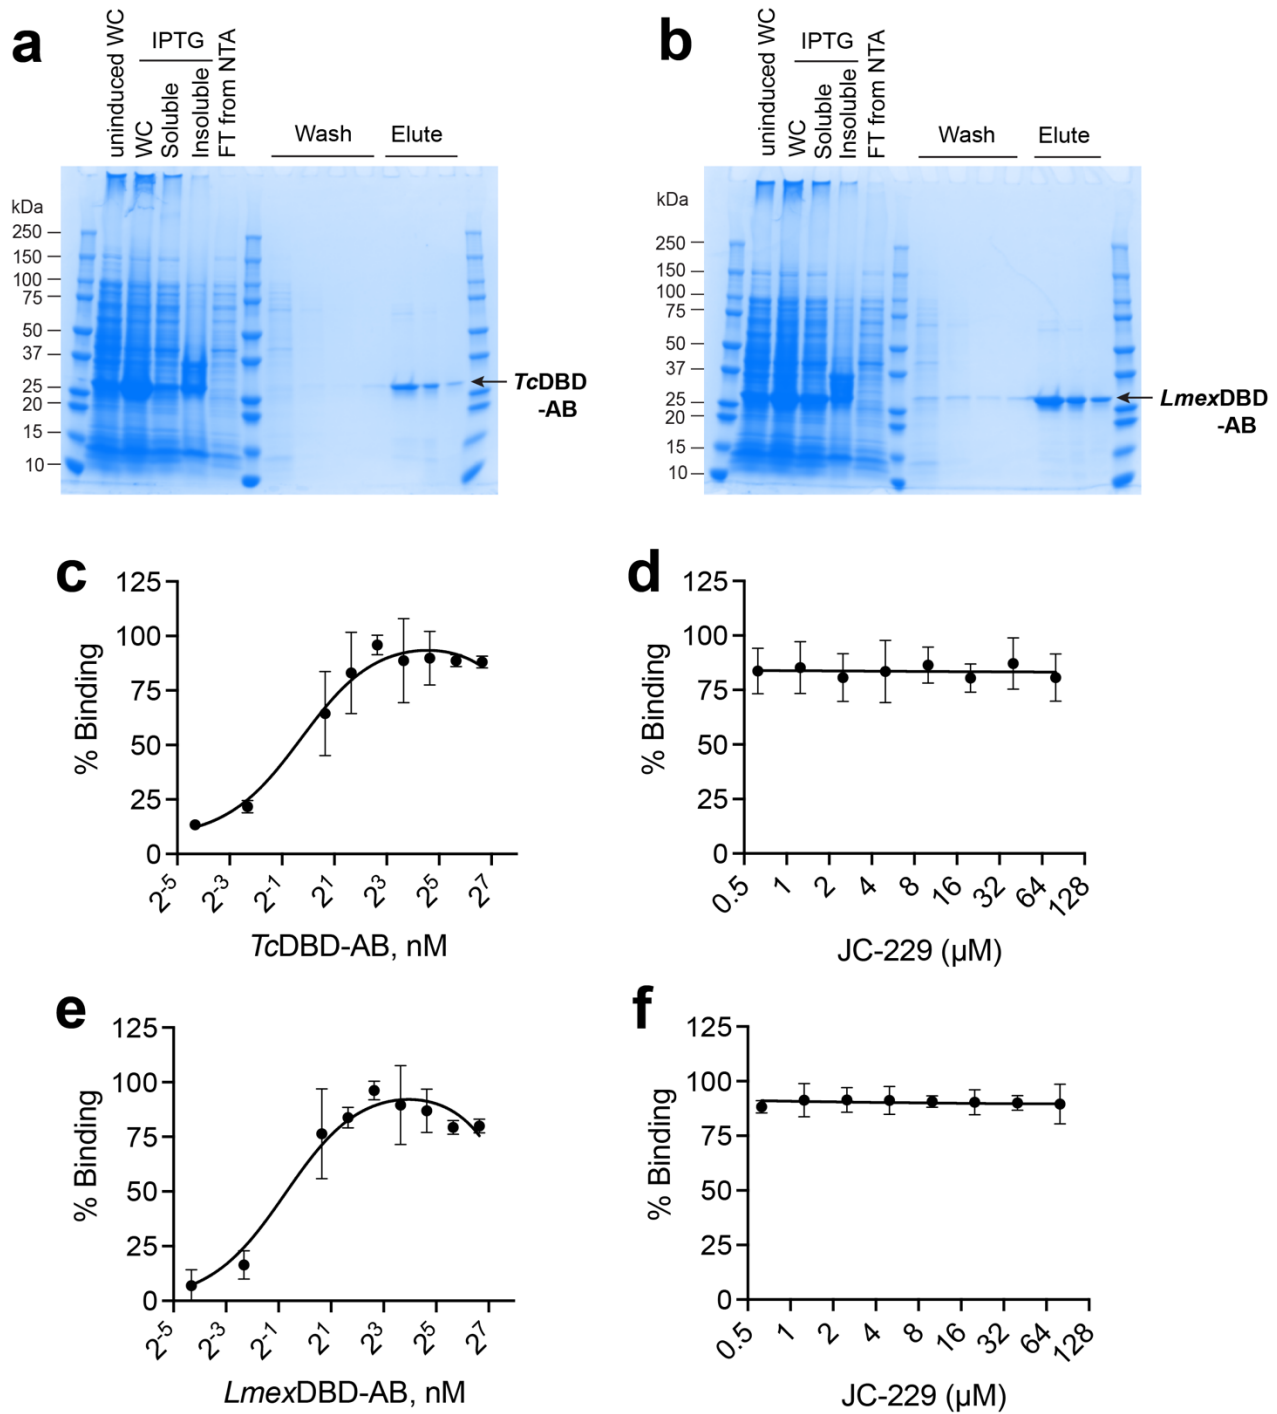

**Supplementary Figure 16. Quantification of ssDNA-binding activity of *Tc* and *LmexRPA1* DBD-AB, and inhibition by JC-229 by EMSA.** **a, b** Ni-NTA purification of *TcRPA1* DBD-AB (**a**) and *LmexRPA1* DBD-AB proteins (**b**) from *E. coli*. Representative SDS-PAGE gels are shown. **c-f** Quantification of protein-ssDNA complexes in EMSA gels in Fig. 6 (**a, b, c, and d, respectively**) using ImageJ software. **c** *TcRPA1* DBD-AB binding with dT<sub>32</sub>. **d** Inhibition of *TcRPA1* DBD-AB's dT<sub>32</sub> binding by JC-229. **e** *LmexRPA1* DBD-AB binding with dT<sub>32</sub>. **f** Inhibition of *LmexRPA1* DBD-AB's dT<sub>32</sub> binding by JC-229. EMSA blots from three independent experiments were quantified for Supplementary Fig.16c-f (n=3). Error bars indicate mean ±SD. Source data are provided as a Source Data file.

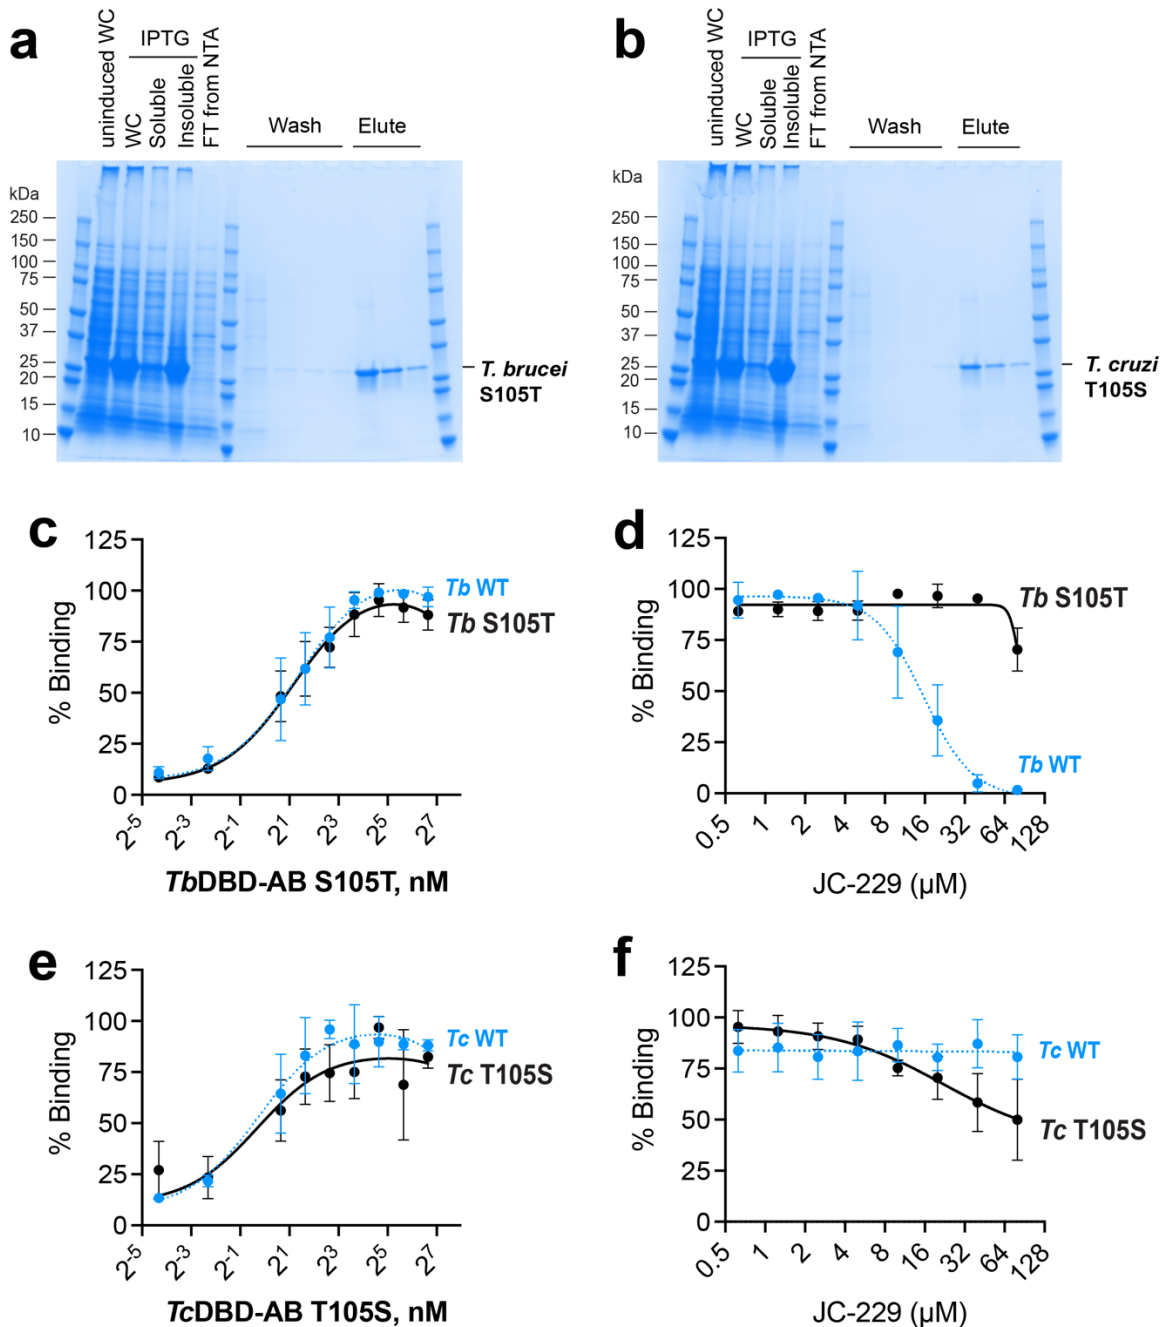

**Supplementary Figure 17. Quantification of ssDNA-binding activity of *Tb*RPA1 DBD-AB S105T and *Tc*RPA1 DBD-AB T105S mutants, and inhibition by JC-229 by EMSA.** **a, b** Ni-NTA purification of *Tb*RPA1 DBD-AB S105T (a) and *Tc*RPA1 DBD-AB T105S (b) mutant proteins from *E. coli*. Representative SDS-PAGE gels are shown. **c-f** Quantification of protein-ssDNA complexes in EMSA gels in Fig. 7d, e, h, i using ImageJ software. EMSA blots from three independent experiments were quantified (n=3). Error bars indicate mean  $\pm$ SD. **c** *Tb*RPA1 DBD-AB S105T mutant's binding with dT<sub>32</sub> (black). EMSA data of WT *Tb*RPA1 DBD-AB from Supplementary Fig. 9a are overlaid for comparison (light blue). **d** Inhibition of *Tb*RPA1 DBD-AB S105T's dT<sub>32</sub> binding by JC-229 (black). EMSA data of WT *Tb*RPA1 DBD-AB from Supplementary Fig. 9b are overlaid for comparison (light blue). **e** *Tc*RPA1 DBD-AB T105S mutant's binding with dT<sub>32</sub>. EMSA data of WT *Tc*RPA1 DBD-AB from Supplementary Fig. 16c are overlaid for comparison (light blue). **f** Inhibition of *Tc*RPA1 DBD-AB T105S mutant's dT<sub>32</sub> binding by JC-229. EMSA data of WT *Tc*RPA1 DBD-AB from Supplementary Fig. 16d are overlaid for comparison (light blue). Source data are provided as a Source Data file.

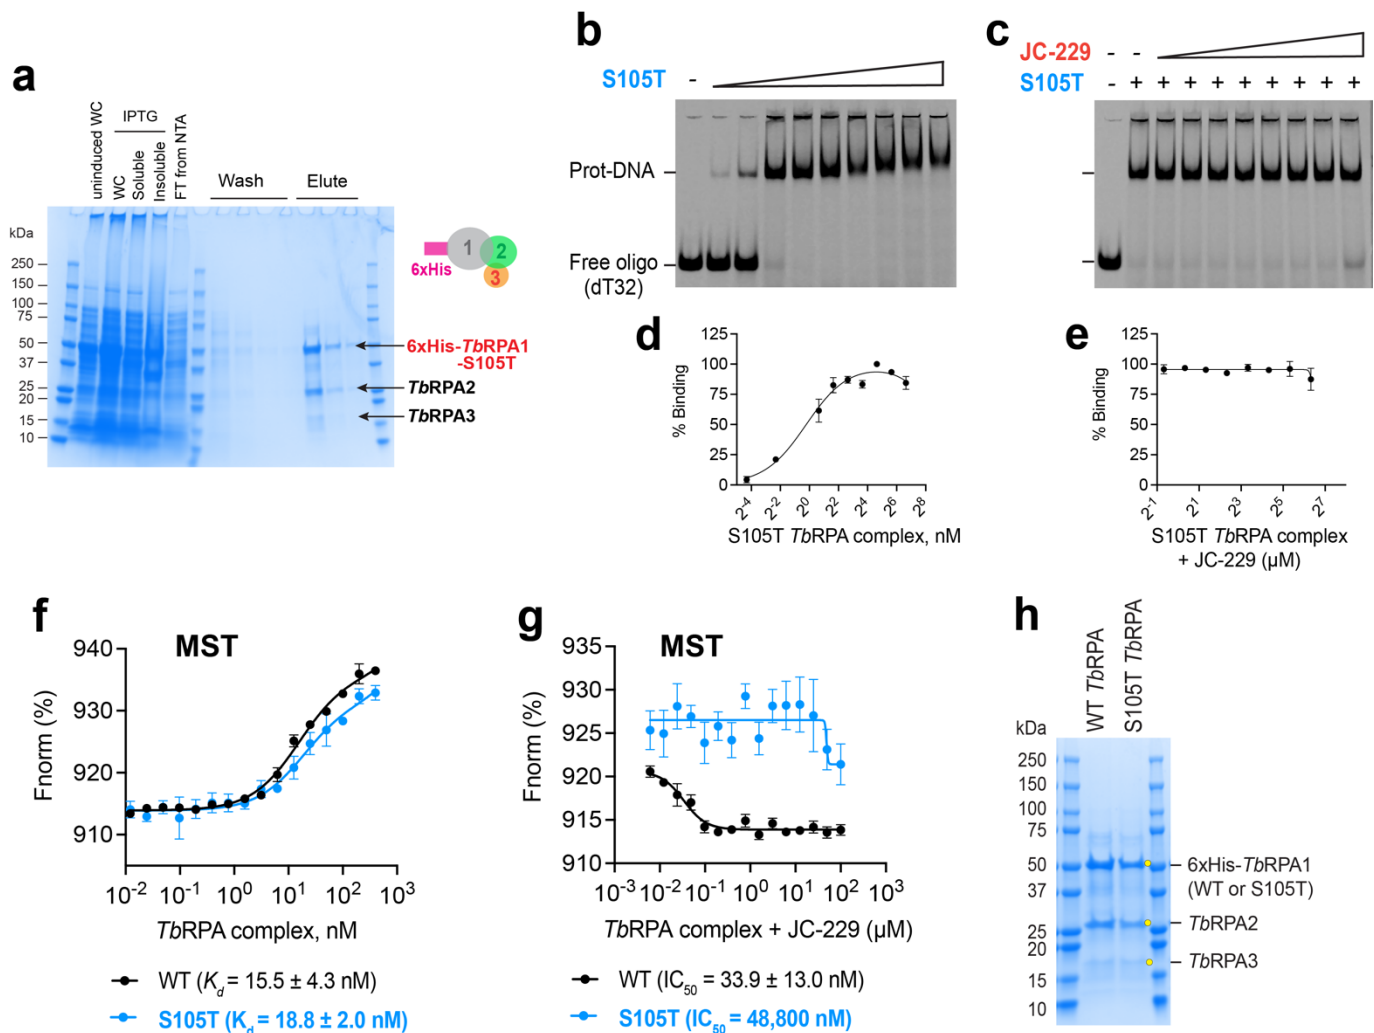

**Supplementary Figure 18. ssDNA binding of S105T *TbrPA* mutant complex and inhibition by JC-229 (EMSA and MST).** **a** Ni-NTA purification of *TbrPA* S105T mutant complex from *E. coli*. Representative SDS-PAGE gel is shown. **b** EMSA showing ssDNA-binding activity of *TbrPA* S105T mutant complex. dT<sub>32</sub> was used as a substrate in all experiments as in Fig. 4. **c** Inhibition of ssDNA-binding activity of *TbrPA* S105T mutant complex by JC-229. **d, e** Quantification of protein-ssDNA complexes in EMSA gels in Supplementary Fig. 18b, c. Three independent experiments (n=3) were quantified using ImageJ software and plotted. Error bars indicate mean  $\pm$ SD. **f** MST assay: ssDNA-binding activity of *TbrPA* S105T mutant complex (blue). *TbrPA* WT data from Supplementary Fig. 11c (dT<sub>32</sub>) are overlaid for comparison (black). **g** Inhibition of ssDNA-binding activity of *TbrPA* S105T mutant by JC-229 (blue). 25 nM of protein was used. *TbrPA* WT data from Supplementary Fig. 11d (dT<sub>32</sub>) are overlaid for comparison (black). Three independent MST experiments were performed in Fig.18f, g (n=3). Error bars indicate mean  $\pm$ SD. Statistical analysis and plotting of MST data were performed with GraphPad Prism software. For *TbrPA* S105 mutant,  $K_d$  was obtained with one site binding total and  $IC_{50}$  was obtained with [Inhibitor] vs. response, variable slope (four parameters). **h** SDS-PAGE gel showing purified fractions used for EMSA and MST assays. Source data are provided as a Source Data file.

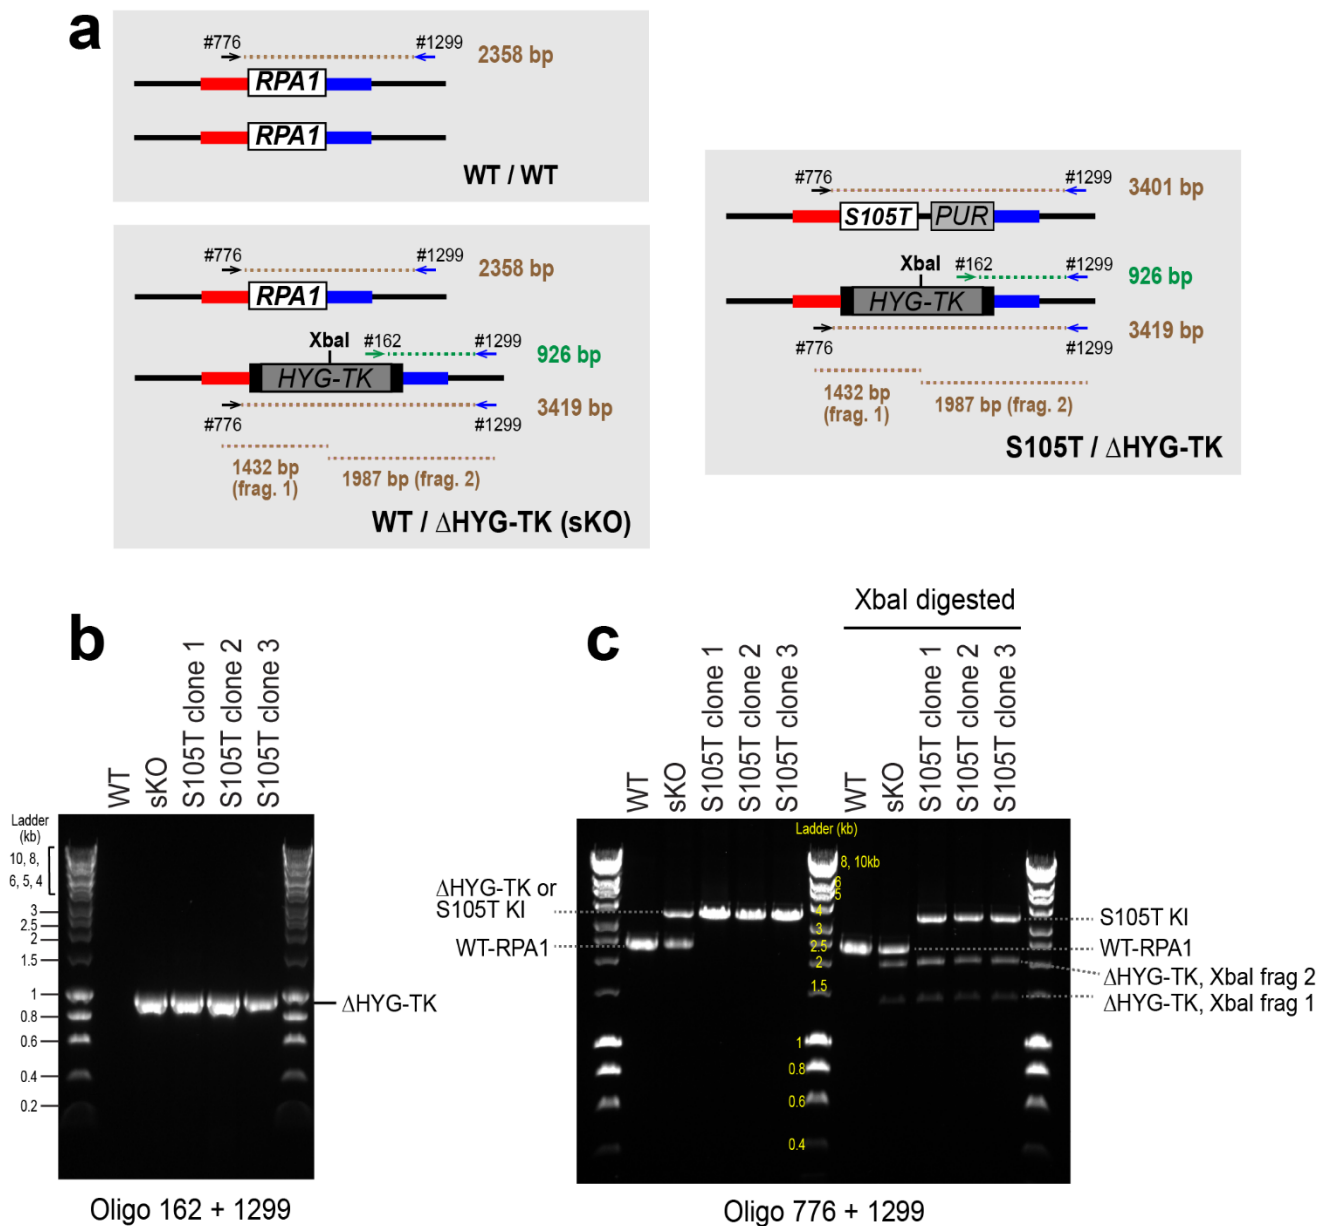

**Supplementary Figure 19. PCR genotyping of *T. brucei* mutant clones containing *TbRPA1*-S105T mutation.** **a** PCR genotyping strategy for *TbRPA1* alleles in the strains of WT (WT/WT), single knock-out (sKO, WT/ΔHYG-TK) and S105T mutant (S105T/ΔHYG-TK). The sizes of the PCR products amplified with oligos 776 and 1299 will be similar between *TbRPA1*ΔHYG-TK and *TbRPA1*-S105T alleles (3,419 bp and 3,401 bp respectively). The amplicon from *TbRPA1*ΔHYG-TK allele should have an XbaI restriction enzyme site within the HYG-TK gene, while no XbaI is present in the amplicon from S105T allele. Thus, two amplicons can be distinguished by XbaI digestion. **b** PCR genotyping confirming the presence of *TbRPA1* KO allele in the sKO and three of the S105T mutant clones. **c** PCR genotyping confirming the genotypes of sKO and S105T mutant clones. *TbRPA1* WT allele was amplified in the WT strain (2,358 bp). To distinguish the KO and S105T alleles, XbaI digestion was performed. As expected, S105T amplicon (3,401 bp) was undigested and KO amplicon (3,419bp) yielded products of 1,987 bp and 1,432 bp after XbaI enzyme digestion. Source data are provided as a Source Data file.

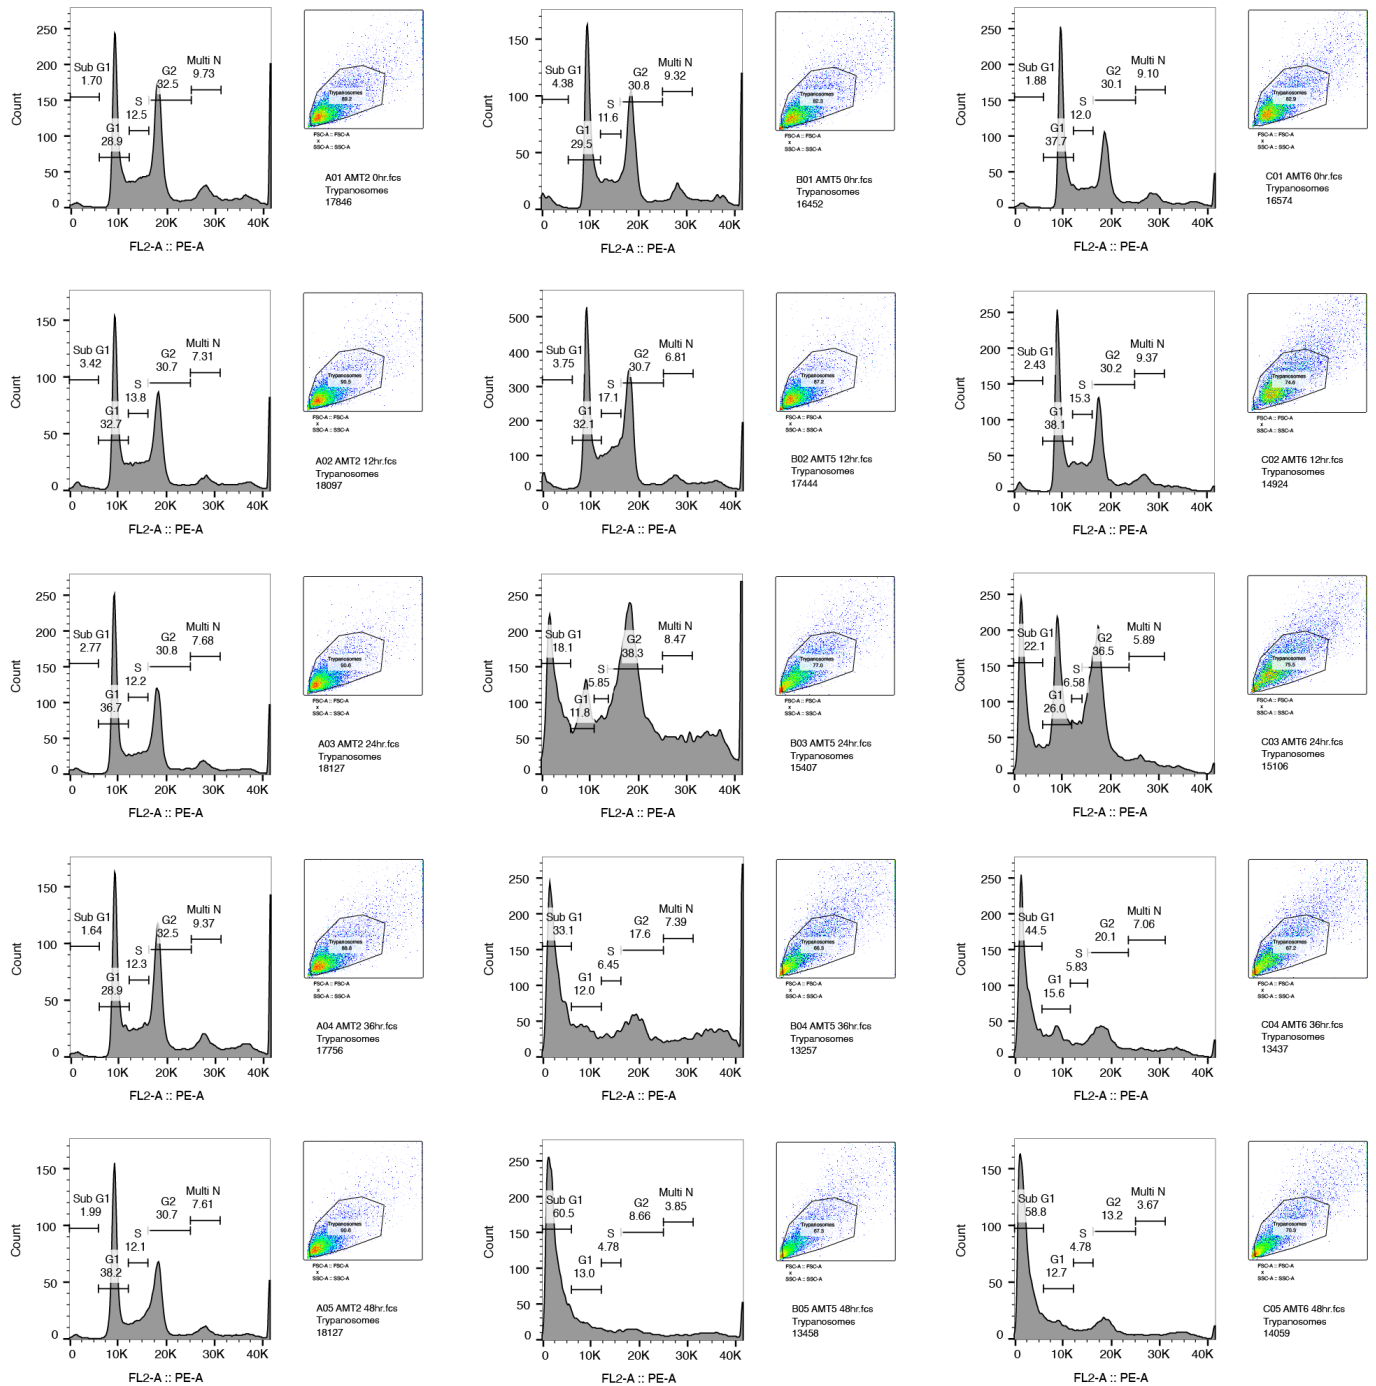

**Supplementary Figure 20. Gating strategies used to analyze the cell-cycle profiles of *TbrPA1*-depleted trypanosome cells (Fig. 2d).** Gatings in the cell-cycle histogram show the percentage of cells in Sub-G1, G1, S, G2 or multinucleated (Multi N). Scatter plots show trypanosome cell gating in each sample.

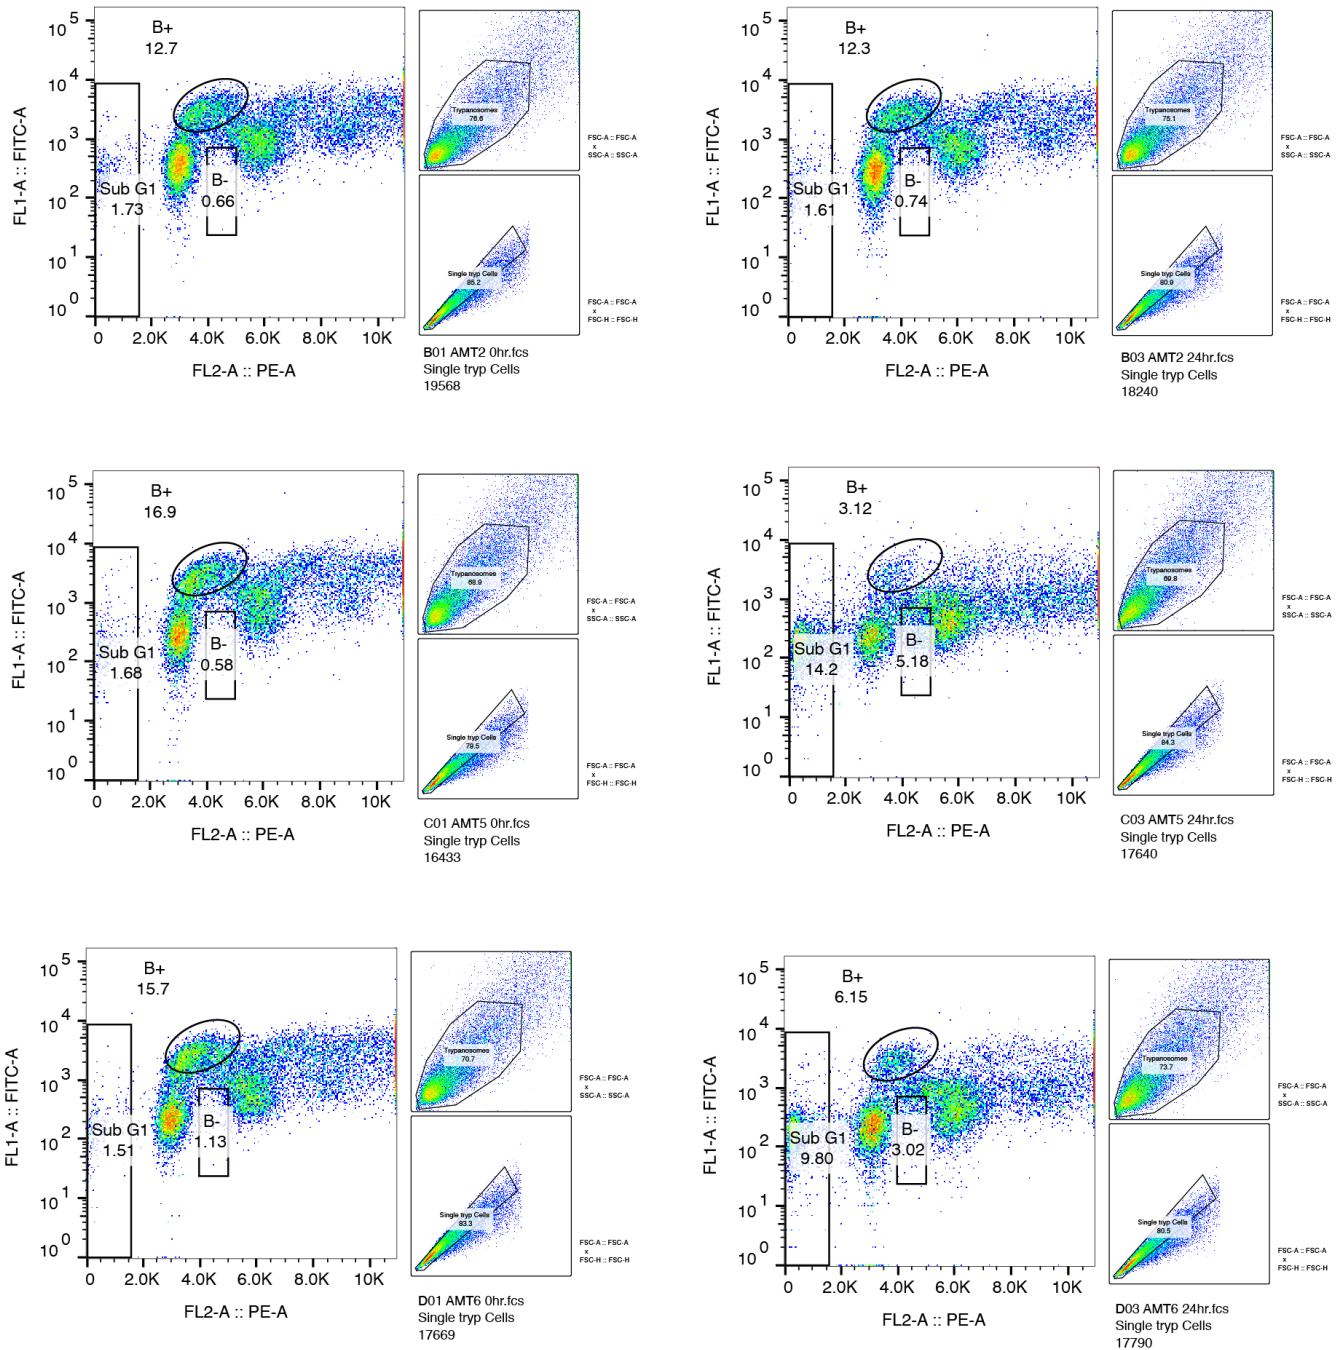

**Supplementary Figure 21. Gating strategies used to analyze BrdU-pulse labeled WT and *TbrPA1*-depleted trypanosome cells (Fig. 2e).** Sub-G1, BrdU-positive (BrdU<sup>+</sup>) and BrdU-negative (BrdU<sup>-</sup>) cells are gated in the scatter plots on the left. Two plots on the right show trypanosome cell and single cell gating strategies.

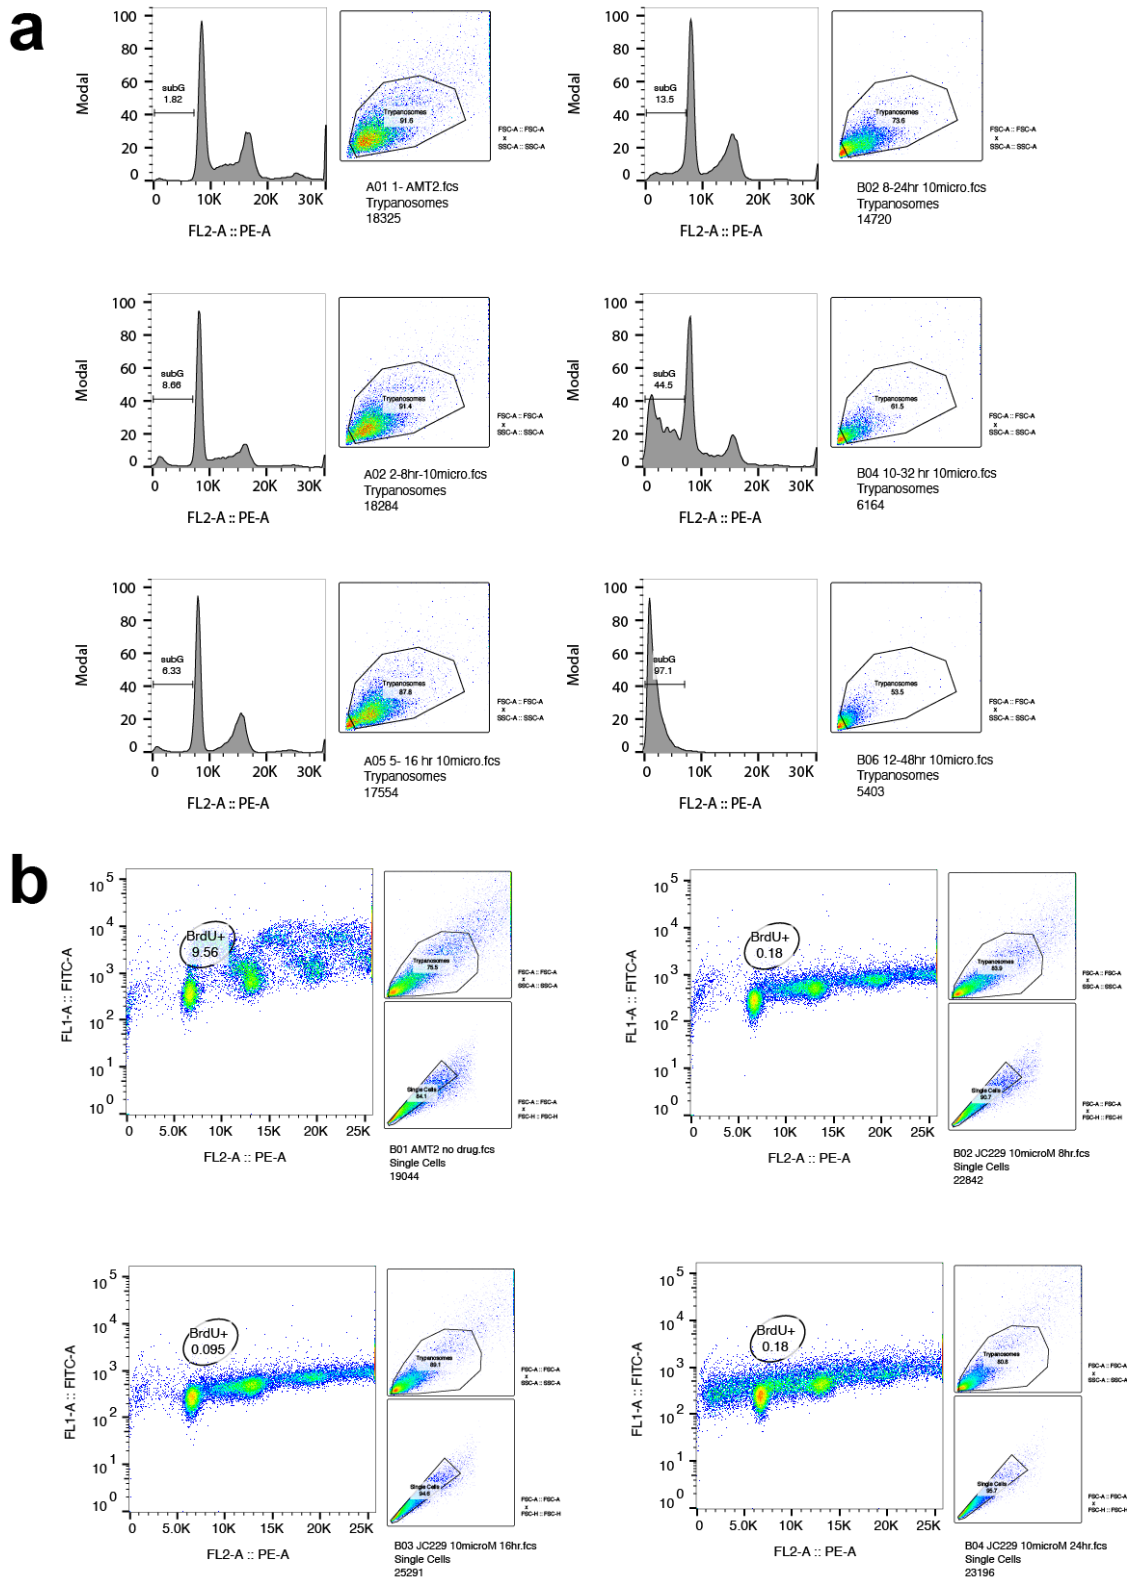

**Supplementary Figure 22. Gating strategies used to analyze the cell-cycle profiles of JC-229-treated trypanosome cells (Fig. 3a) and BrdU-pulse labeling of JC-229-treated trypanosome cells (Fig. 3b).** **a** Gatings in the cell-cycle histogram show the percentage of cells in Sub-G1. Scatter plots show trypanosome cell gating in each sample. **b** BrdU-pulse labeling. BrdU-positive (BrdU<sup>+</sup>) cells are gated in the scatter plots on the left. Two plots on the right show trypanosome cell and single cell gating strategies.



## Supplementary References

1. Alsford, S. et al. High-throughput phenotyping using parallel sequencing of RNA interference targets in the African trypanosome. *Genome Res* **21**, 915-924 (2011).
2. Wirtz, E., Leal, S., Ochatt, C. & Cross, G. A. M. A tightly regulated inducible expression system for dominant negative approaches in *Trypanosoma brucei*. *Molecular & Biochemical Parasitology* **99**, 89-101 (1999).
3. Schulz, D., Zaringhalam, M., Papavasiliou, F. N. & Kim, H. S. Base J and H3.V Regulate Transcriptional Termination in *Trypanosoma brucei*. *PLoS Genet* **12**, e1005762 (2016).
4. Henricksen, L. A., Umbricht, C. B. & Wold, M. S. Recombinant replication protein A: expression, complex formation, and functional characterization. *J Biol Chem* **269**, 11121-11132 (1994).
