# Supplementary material for: Identification of a small-molecule inhibitor that selectively blocks DNA-binding by Trypanosoma brucei replication protein A1
Source: PubMed Central journal article supplement (PMC10359466; doi:10.1038/s41467-023-39839-x), 2023-07-20
Supplement: 41467_2023_39839_MOESM3_ESM.pdf [file 41467_2023_39839_MOESM3_ESM.pdf]

## Reporting Summary

Nature Portfolio wishes to improve the reproducibility of the work that we publish. This form provides structure for consistency and transparency in reporting. For further information on Nature Portfolio policies, see our [Editorial Policies](#) and the [Editorial Policy Checklist](#).

### Statistics

For all statistical analyses, confirm that the following items are present in the figure legend, table legend, main text, or Methods section.

- | n/a                                 | Confirmed                                                                                                                                                                                                                                                                                      |
|-------------------------------------|------------------------------------------------------------------------------------------------------------------------------------------------------------------------------------------------------------------------------------------------------------------------------------------------|
| <input type="checkbox"/>            | <input checked="" type="checkbox"/> The exact sample size ( $n$ ) for each experimental group/condition, given as a discrete number and unit of measurement                                                                                                                                    |
| <input type="checkbox"/>            | <input checked="" type="checkbox"/> A statement on whether measurements were taken from distinct samples or whether the same sample was measured repeatedly                                                                                                                                    |
| <input type="checkbox"/>            | <input checked="" type="checkbox"/> The statistical test(s) used AND whether they are one- or two-sided<br><i>Only common tests should be described solely by name; describe more complex techniques in the Methods section.</i>                                                               |
| <input checked="" type="checkbox"/> | <input type="checkbox"/> A description of all covariates tested                                                                                                                                                                                                                                |
| <input checked="" type="checkbox"/> | <input type="checkbox"/> A description of any assumptions or corrections, such as tests of normality and adjustment for multiple comparisons                                                                                                                                                   |
| <input type="checkbox"/>            | <input checked="" type="checkbox"/> A full description of the statistical parameters including central tendency (e.g. means) or other basic estimates (e.g. regression coefficient) AND variation (e.g. standard deviation) or associated estimates of uncertainty (e.g. confidence intervals) |
| <input type="checkbox"/>            | <input checked="" type="checkbox"/> For null hypothesis testing, the test statistic (e.g. $F$ , $t$ , $r$ ) with confidence intervals, effect sizes, degrees of freedom and $P$ value noted<br><i>Give <math>P</math> values as exact values whenever suitable.</i>                            |
| <input checked="" type="checkbox"/> | <input type="checkbox"/> For Bayesian analysis, information on the choice of priors and Markov chain Monte Carlo settings                                                                                                                                                                      |
| <input checked="" type="checkbox"/> | <input type="checkbox"/> For hierarchical and complex designs, identification of the appropriate level for tests and full reporting of outcomes                                                                                                                                                |
| <input checked="" type="checkbox"/> | <input type="checkbox"/> Estimates of effect sizes (e.g. Cohen's $d$ , Pearson's $r$ ), indicating how they were calculated                                                                                                                                                                    |

*Our web collection on [statistics for biologists](#) contains articles on many of the points above.*

### Software and code

Policy information about [availability of computer code](#)

#### Data collection

Flow cytometry data were collected from BD FACS Via and BD FACSDiva software (BD Biosciences).  
 MicroScale Thermophoresis data were obtained using Monolith NT.115 instrument.  
 EMSA data were obtained using LI-COR imaging system.  
 Fluorescence readings for AlamarBlue assay were obtained using Synergy HI microplate reader (BioTek).  
 Cell images (DIC and DAPI stained) were obtained from EVOS M5000 microscope.  
 The homology model of TbrPAL was obtained from the protein structure homology-modeling server (SWISS-MODEL), and the structure was built based on the 4gop.I.C structure.  
 Induced Fit Docking module in Schrodinger Small Molecule Drug Discovery Suite 2020-2 was used to generate the model structure of the TbrPAL - JC-229 complex.  
 $^1\text{H}$  and  $^{13}\text{C}$  NMR spectra were recorded on a Bruker 400 MHz and 101 MHz instrument, respectively. Mass Spectra were collected over  $m/z$  200-1200 and recorded on Advion Mass Express CMS v6.2.22.I.  
 Mass spectrometry was performed using a Q Exactive HF tandem mass spectrometer coupled to a Dionex Ultimate 3000 RLSnano system (Thermo Scientific). The LC-MS/MS peak list was generated by Thermo Proteome Discoverer (v.2.1) into Mascot Generic Format (MGS).  
 Mass photometry data was acquired on a Refeyn OneMP instrument (Refeyn Ltd).  
 ATRIP- $\epsilon$ -Acp-Cy5 probe was characterized by high-resolution Mass Spectrometer (HRMS) and analytical Liquid Chromatography (LC) at  $\lambda = 650$  nm: HRMS (ESI-TOF)  $m/z$  calculated for  $\text{C}_{111}\text{H}_{147}\text{N}_{18}\text{O}_{26}^+$   $[M]^+$  2148.0728, found 2148.0699.

#### Data analysis

Flow cytometry data were analyzed using FlowJo software (version 10).  
 Images were analyzed using ImageJ (version 1.53) and Adobe Photoshop (version 24.5.0).  
 Data plotting and statistical analyses were performed using GraphPad Prism (version 9.3.1).

The model structures were visually analyzed in Maestro v12.4, and structural images were generated using PyMOL 2.0.7. MestReNova v14.1.0 software was used to analyze NMR spectroscopic data. Advion Data Express v6.2.22.1 was used to analyze Mass spectroscopic data. Mass photometry data were analyzed using Refeyn AcquireMP (v. 2022 R1; Refeyn Ltd) and Refeyn DiscoverMP (v. 2022 R1; Refeyn Ltd).

For manuscripts utilizing custom algorithms or software that are central to the research but not yet described in published literature, software must be made available to editors and reviewers. We strongly encourage code deposition in a community repository (e.g. GitHub). See the Nature Portfolio [guidelines for submitting code & software](#) for further information.

## Data

Policy information about [availability of data](#)

All manuscripts must include a [data availability statement](#). This statement should provide the following information, where applicable:

- Accession codes, unique identifiers, or web links for publicly available datasets
- A description of any restrictions on data availability
- For clinical datasets or third party data, please ensure that the statement adheres to our [policy](#)

All the data are available within the manuscript, Supplementary Information and Source File.  
LC-MS/MS data is accessible in the ProteomeXchange Consortium-PRIDE repository database with accession code PXD042808.

## Human research participants

Policy information about [studies involving human research participants and Sex and Gender in Research](#).

|                             |                                  |
|-----------------------------|----------------------------------|
| Reporting on sex and gender | <input type="text" value="N/A"/> |
| Population characteristics  | <input type="text" value="N/A"/> |
| Recruitment                 | <input type="text" value="N/A"/> |
| Ethics oversight            | <input type="text" value="N/A"/> |

Note that full information on the approval of the study protocol must also be provided in the manuscript.

## Field-specific reporting

Please select the one below that is the best fit for your research. If you are not sure, read the appropriate sections before making your selection.

- Life sciences       Behavioural & social sciences       Ecological, evolutionary & environmental sciences

For a reference copy of the document with all sections, see [nature.com/documents/nr-reporting-summary-flat.pdf](https://www.nature.com/documents/nr-reporting-summary-flat.pdf)

## Life sciences study design

All studies must disclose on these points even when the disclosure is negative.

|                 |                                                                                                                               |
|-----------------|-------------------------------------------------------------------------------------------------------------------------------|
| Sample size     | <input type="text" value="Sample size was determined by data availability."/>                                                 |
| Data exclusions | <input type="text" value="No data were excluded."/>                                                                           |
| Replication     | <input type="text" value="All results were reproducible, performed independently at least 3 times and mean value was used."/> |
| Randomization   | <input type="text" value="All data were analyzed in an unbiased way."/>                                                       |
| Blinding        | <input type="text" value="Blinding was not used because no bias or randomization was involved in the study."/>                |

## Reporting for specific materials, systems and methods

We require information from authors about some types of materials, experimental systems and methods used in many studies. Here, indicate whether each material, system or method listed is relevant to your study. If you are not sure if a list item applies to your research, read the appropriate section before selecting a response.

## Materials &amp; experimental systems

|                                     |                                                           |
|-------------------------------------|-----------------------------------------------------------|
| n/a                                 | Involvement in the study                                  |
| <input type="checkbox"/>            | <input checked="" type="checkbox"/> Antibodies            |
| <input type="checkbox"/>            | <input checked="" type="checkbox"/> Eukaryotic cell lines |
| <input checked="" type="checkbox"/> | <input type="checkbox"/> Palaeontology and archaeology    |
| <input checked="" type="checkbox"/> | <input type="checkbox"/> Animals and other organisms      |
| <input checked="" type="checkbox"/> | <input type="checkbox"/> Clinical data                    |
| <input checked="" type="checkbox"/> | <input type="checkbox"/> Dual use research of concern     |

## Methods

|                                     |                                                    |
|-------------------------------------|----------------------------------------------------|
| n/a                                 | Involvement in the study                           |
| <input checked="" type="checkbox"/> | <input type="checkbox"/> ChIP-seq                  |
| <input type="checkbox"/>            | <input checked="" type="checkbox"/> Flow cytometry |
| <input checked="" type="checkbox"/> | <input type="checkbox"/> MRI-based neuroimaging    |

## Antibodies

Antibodies used

We have used our own rabbit polyclonal gamma H2A antibody [generated by ABclonal, ID E16070 (P)] ; Rabbit polyclonal RPAI antibody (ID:21371) was a gift from Dr. Li (Cleveland State University) as mentioned in the acknowledgments; Mouse monoclonal VSG3 [Catalog/Clone VSG224-11D6, Antibody and Bioresource Core facility at MSKCC], mouse Tubulin [Sigma, Catalog T7451, Clone 6-11B-1, LOT number 0000149704 ] and mouse BrdU [BD Pharmingen, Catalog 555627, lot 6084615] antibodies were obtained commercially. Donkey anti-mouse A488 [Invitrogen, catalog A-21202, lot 94-C2-1], rabbit HRP [GE healthcare, catalog NA934V, lot 17640116], mouse HRP [GE healthcare, catalog NA931V, lot lot 17041904] secondary antibodies were used.

Validation

Mouse VSG3 antibody in PMID 29018220 & PMID 34722526; Mouse Tubulin antibody in PMID 34722526. BrdU antibody: PMID 34722526

## Eukaryotic cell lines

Policy information about [cell lines and Sex and Gender in Research](#)

Cell line source(s)

Trypanosoma brucei brucei Lister 427 strain (Single Marker, SM background) originally from George Cross Laboratory, Rockefeller University, in Methods, page 17. HSTB-904 was generated in SM background, Methods, page 17. Trypanosoma brucei brucei Lister 427 strain (2T1) from David Horn, University of Dundee, in Methods, page 17 (originally from George Cross Laboratory, Rockefeller University). HeLa (CRM-CCL-2) and HEK293 (CRL-3216) cell lines are commercially available from ATCC and were kindly gifted by Suzuki lab, Rutgers University.

Authentication

RNA-seq

Mycoplasma contamination

We did not test Mycoplasma contamination.

Commonly misidentified lines  
(See [ICLAC](#) register)

No commonly misidentified cell lines were used.

## Flow Cytometry

## Plots

Confirm that:

- The axis labels state the marker and fluorochrome used (e.g. CD4-FITC).
- The axis scales are clearly visible. Include numbers along axes only for bottom left plot of group (a 'group' is an analysis of identical markers).
- All plots are contour plots with outliers or pseudocolor plots.
- A numerical value for number of cells or percentage (with statistics) is provided.

## Methodology

Sample preparation

See section "Cell-cycle analysis and BrdU pulse experiments using flow cytometry" in Methods, page 19.

Instrument

BD-FACSVia.

Software

FACSDiva and FlowJo software (V.10) was used for analysis.

Cell population abundance

N/A. We used a single cell type (T. brucei).

Gating strategy

For cell cycle analysis, trypanosome cells were gated via forward and side scatter (FSC vs SSC) to eliminate cell debris. For BrdU pulse, trypanosome cells were gated using FSC vs SSC and then gated via FSC-A vs FSC-H for single cell gating.

Tick this box to confirm that a figure exemplifying the gating strategy is provided in the Supplementary Information.
